# Supplementary material for: EGFR transactivates RON to drive oncogenic crosstalk
Source: eLife journal article supplement (doi:10.7554/elife.63678), 2021-11-25

Figure 1A - Source Data

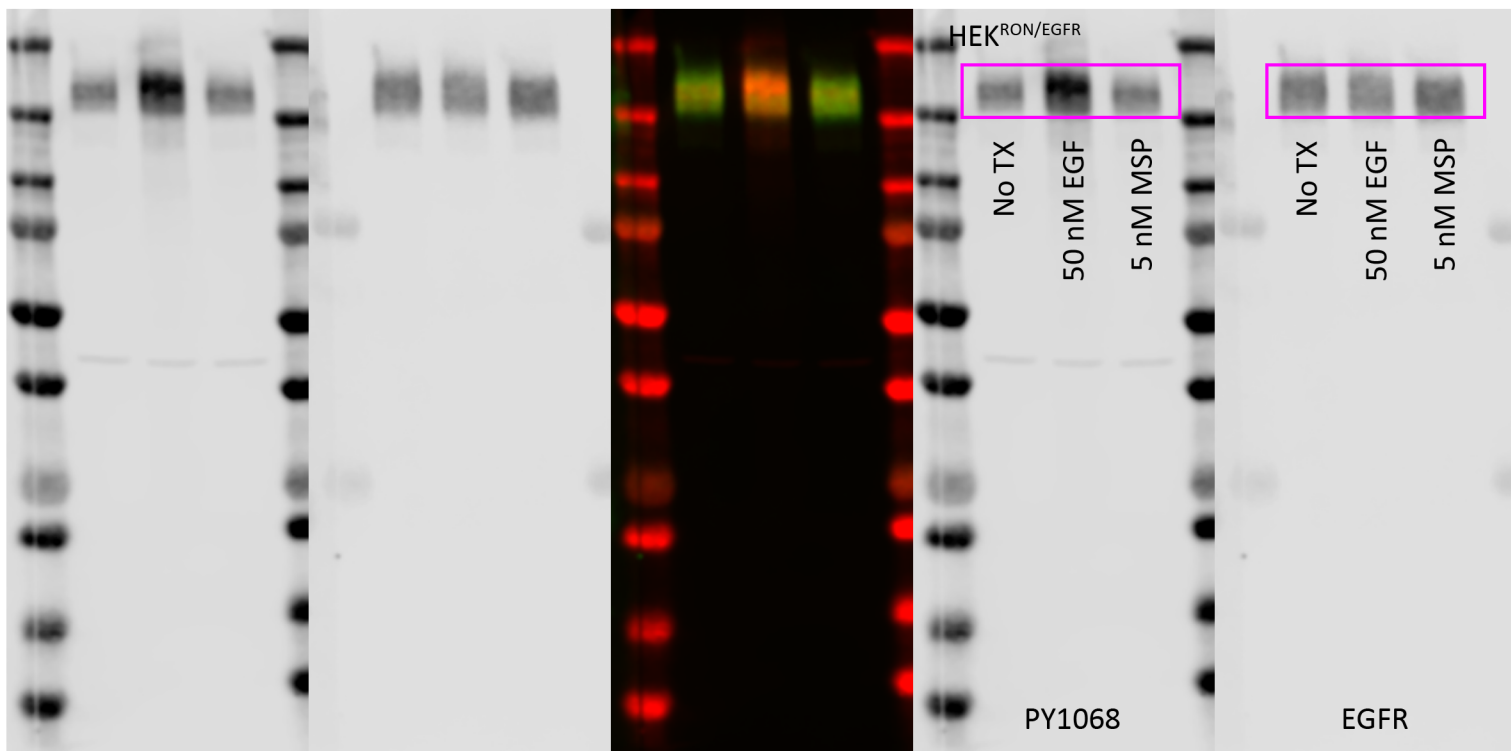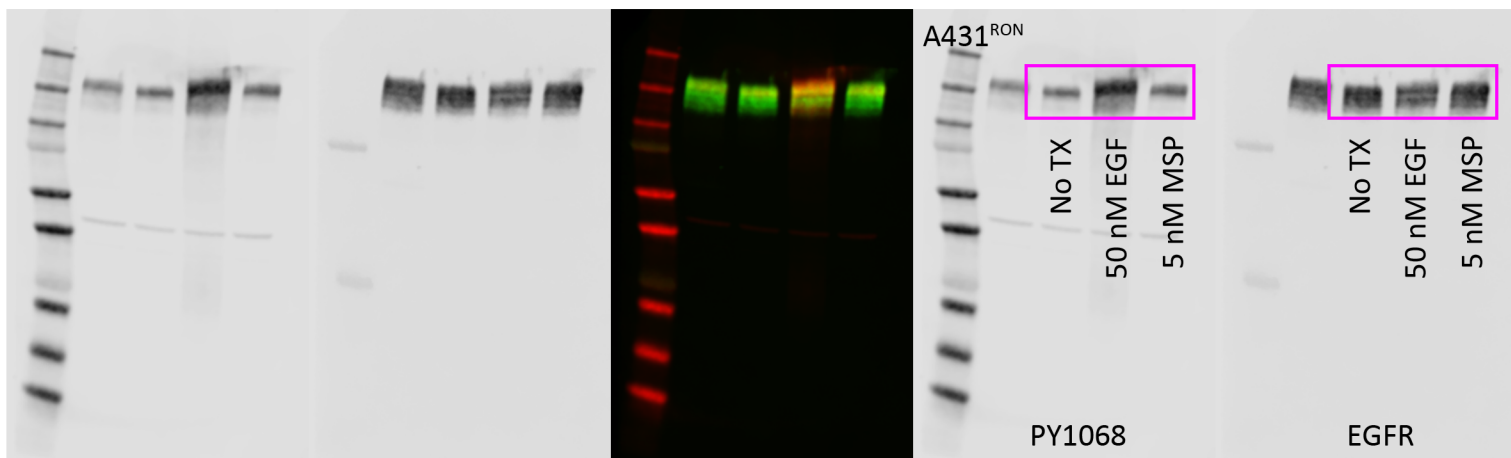

Figure 1B - Source Data

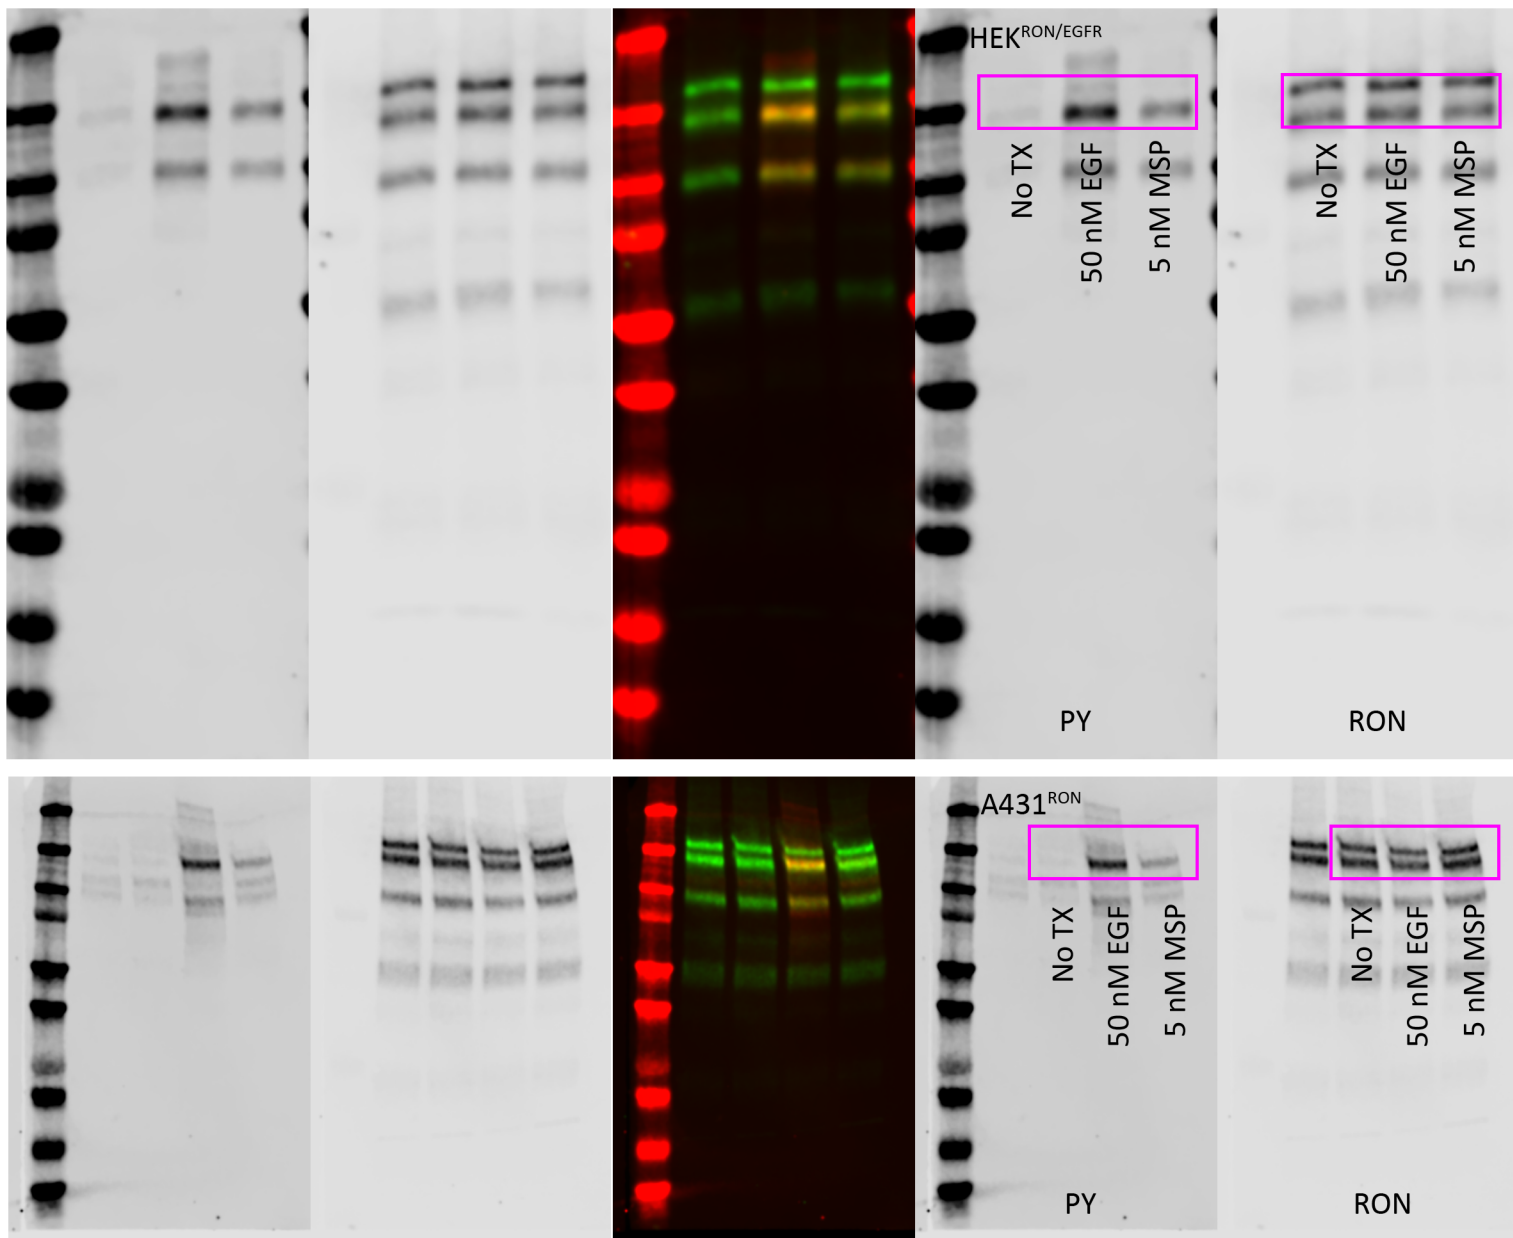

Figure 1C - Source Data

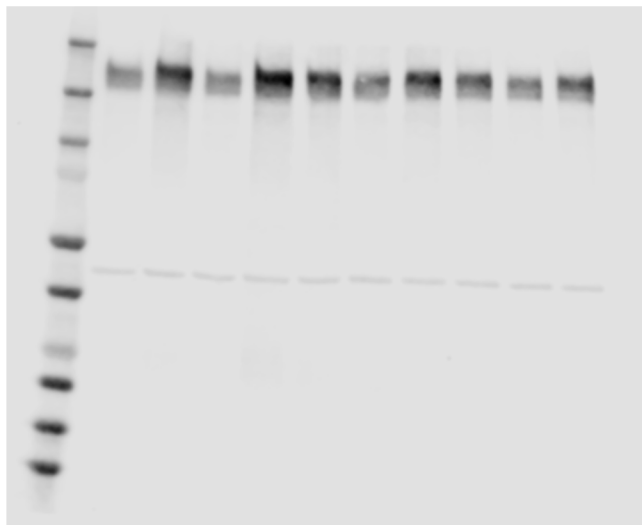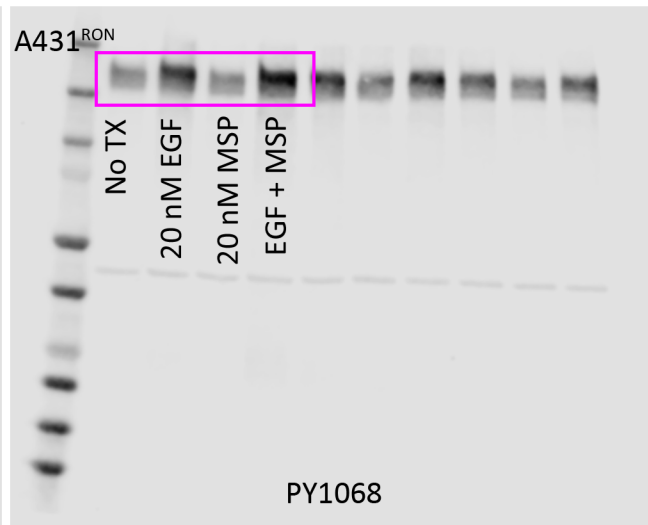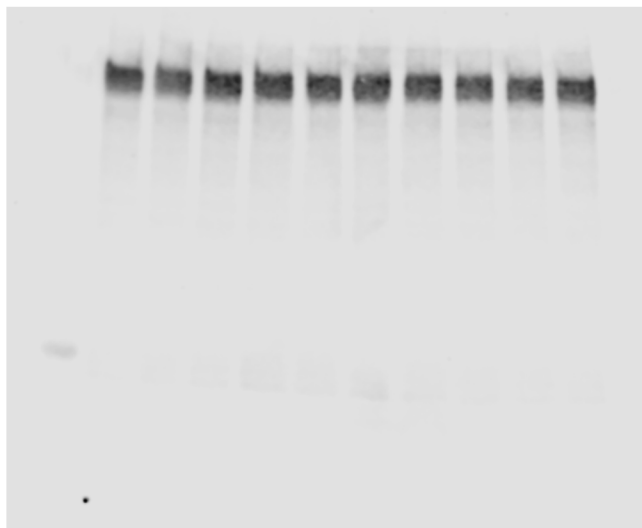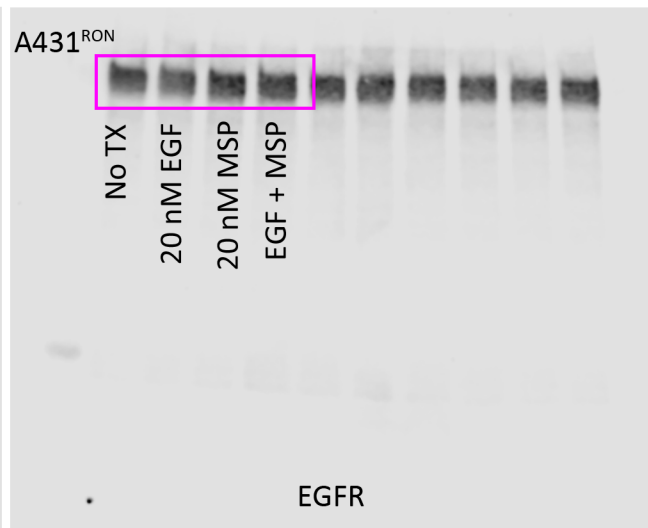

Figure 1D - Source Data

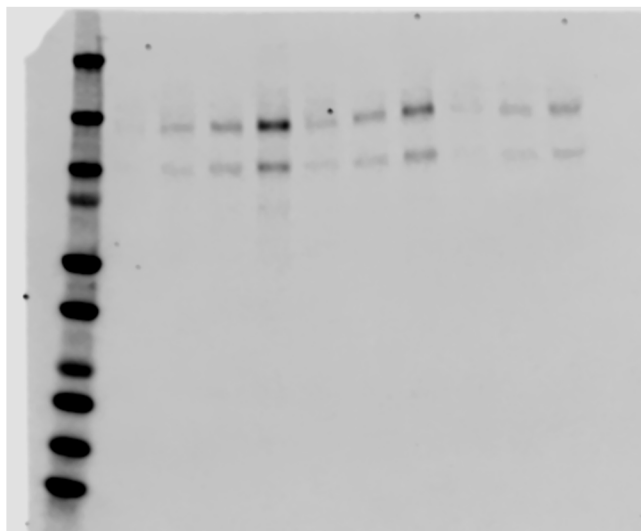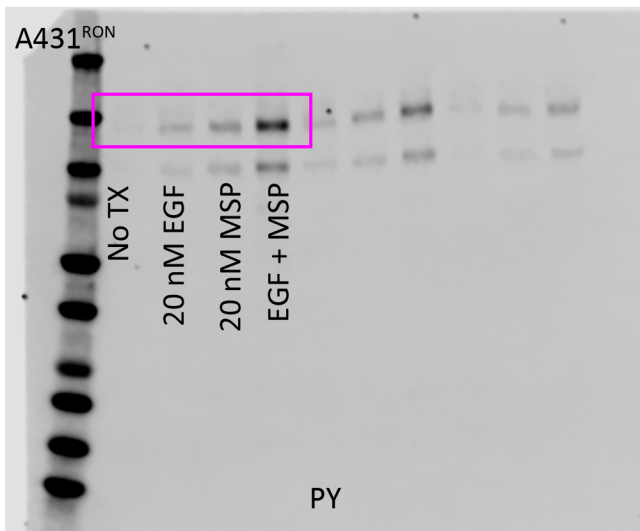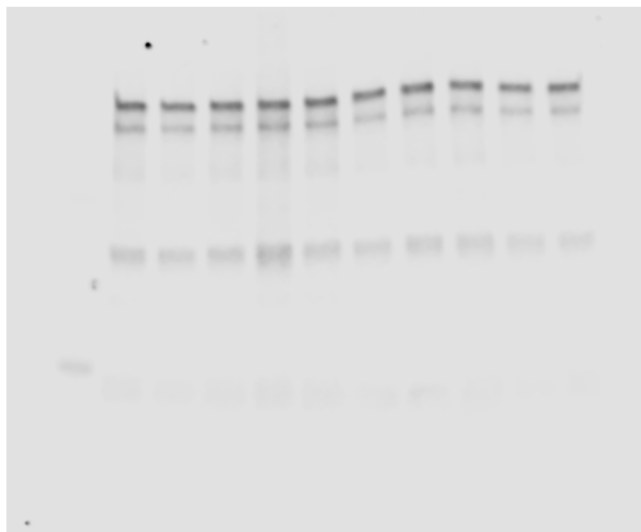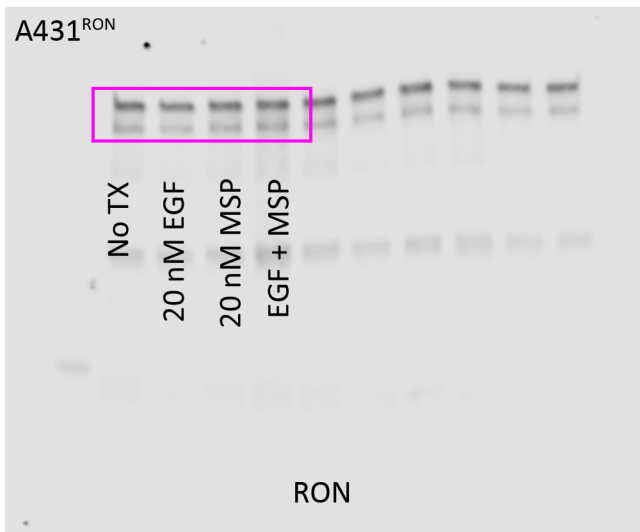



Figure 1E - Source Data

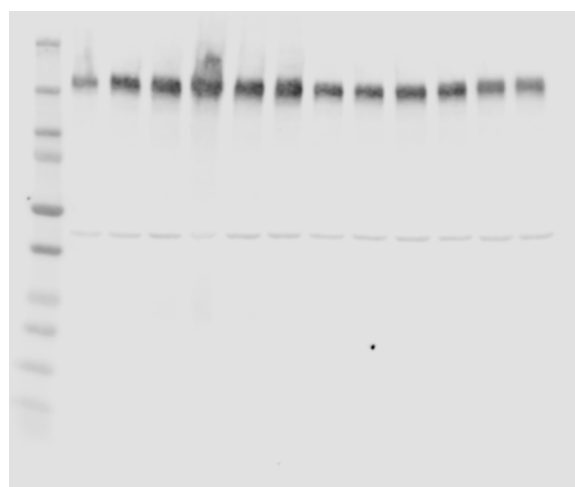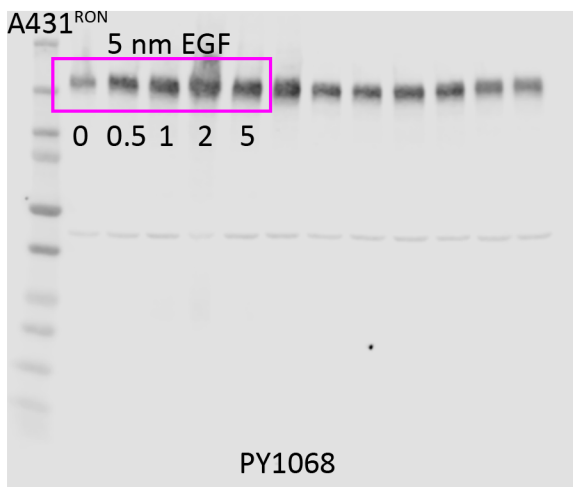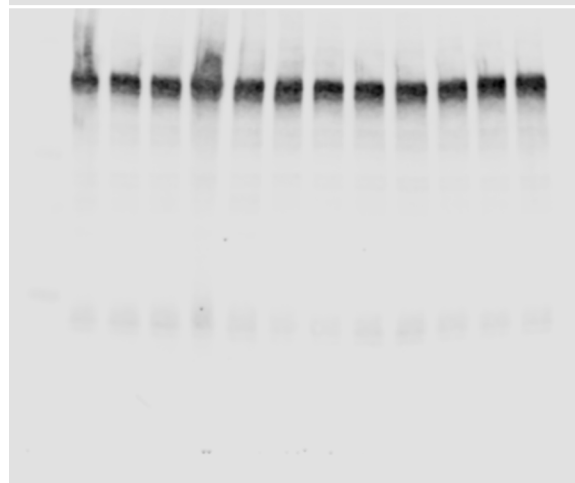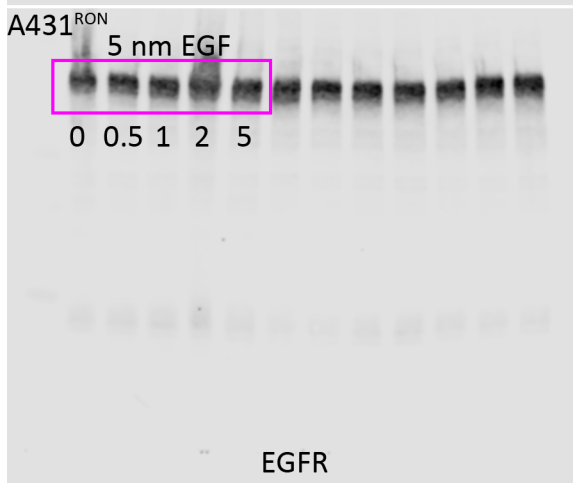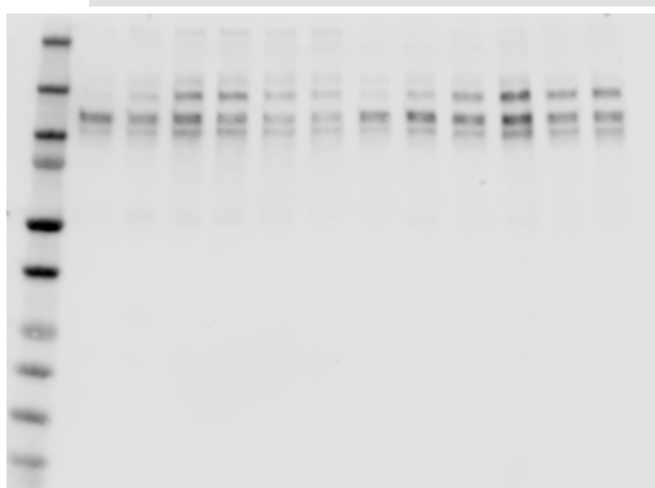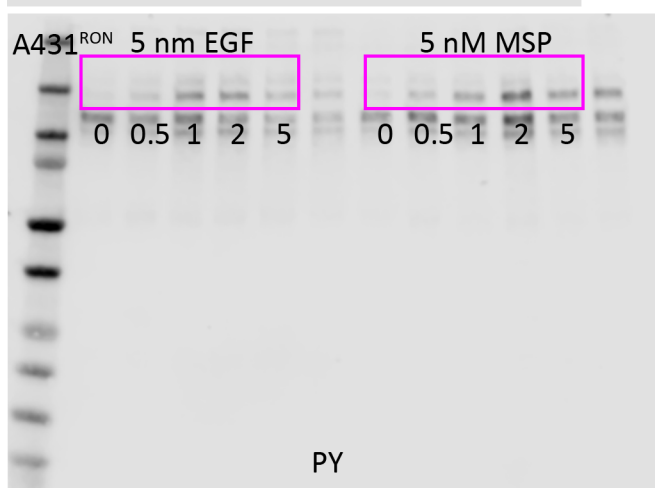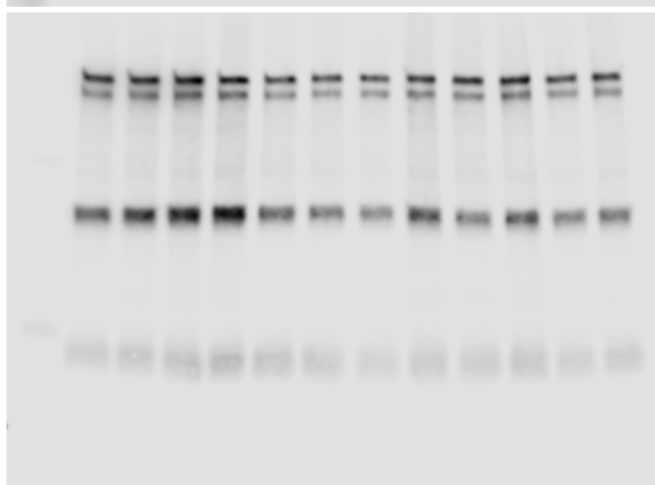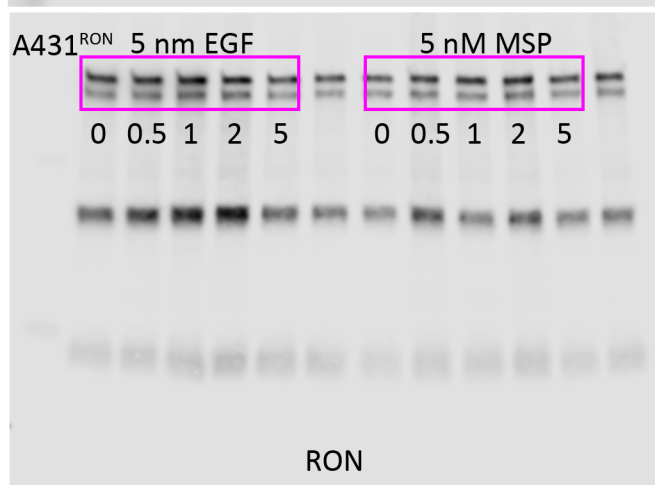

Supplement: fig1-data1 [file elife-63678-fig1-data1-v2.zip]
