# Supplementary material for: EGFR transactivates RON to drive oncogenic crosstalk
Source: eLife journal article supplement (doi:10.7554/elife.63678), 2021-11-25

Figure 6 - Figure Supplement 2 - Source Data 1 - Replicate 1

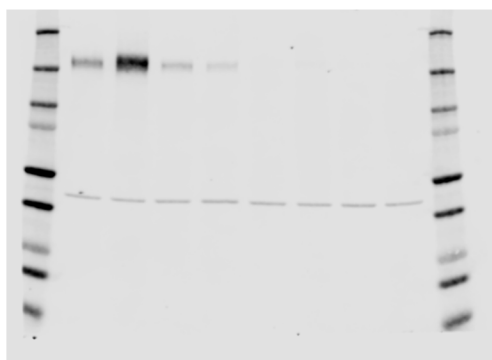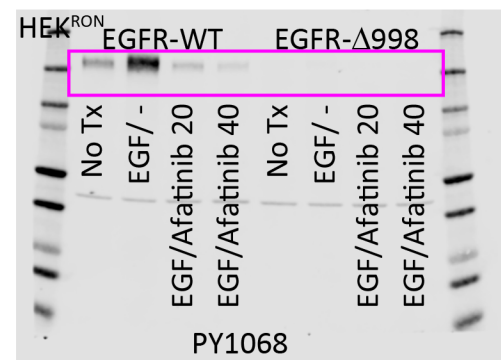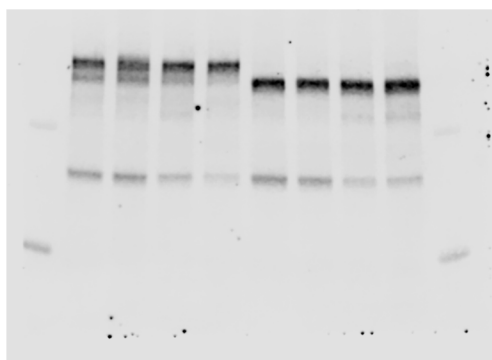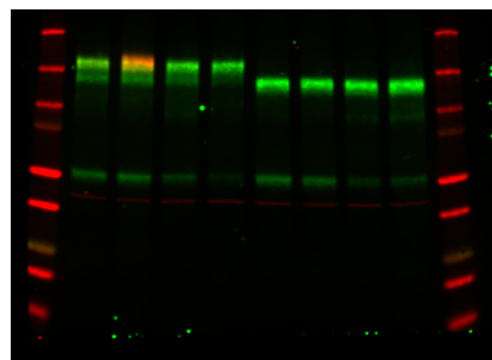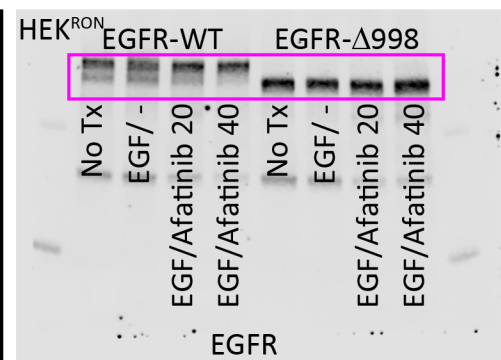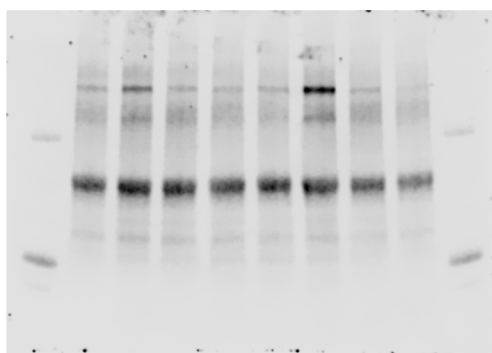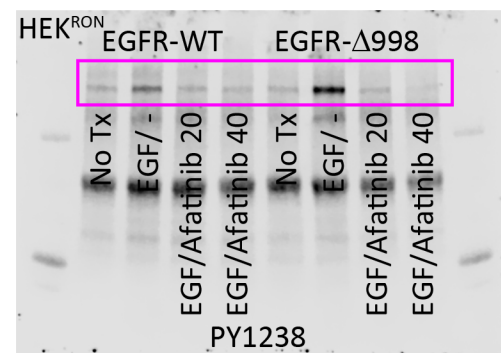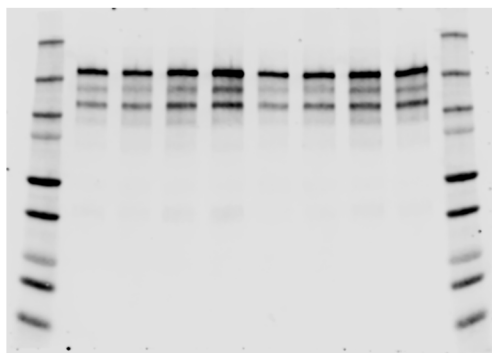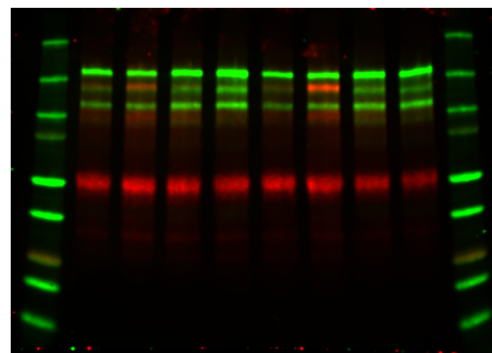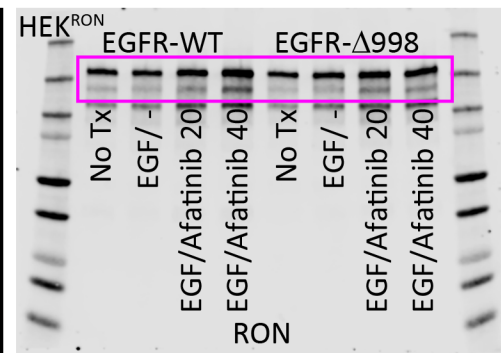

Figure 6 - Figure Supplement 2 - Source Data 1 - Replicate 2

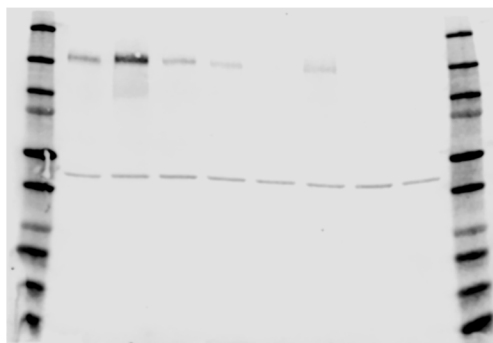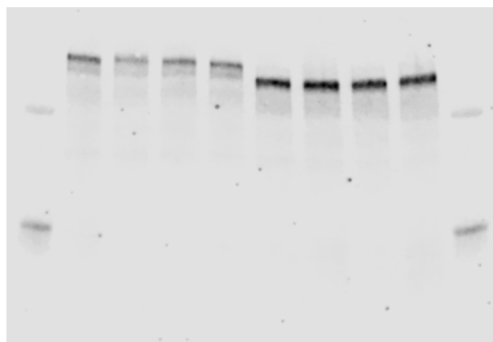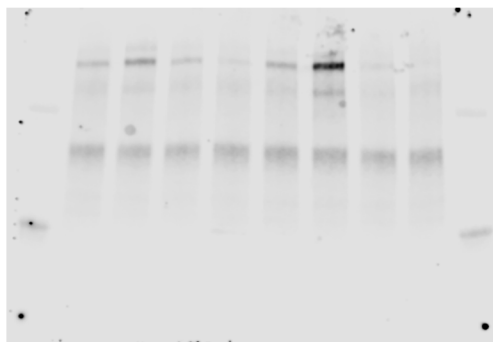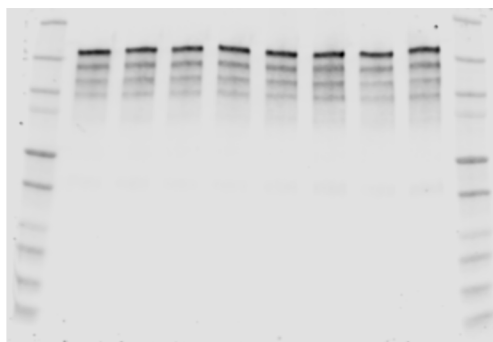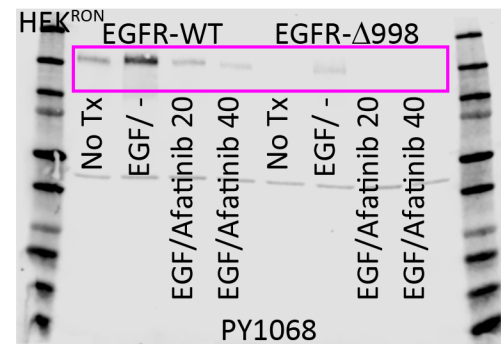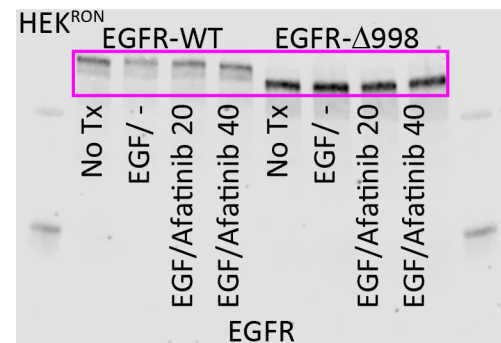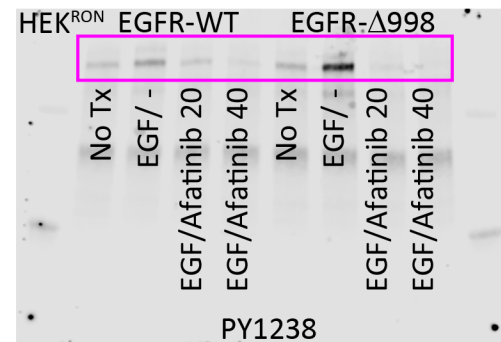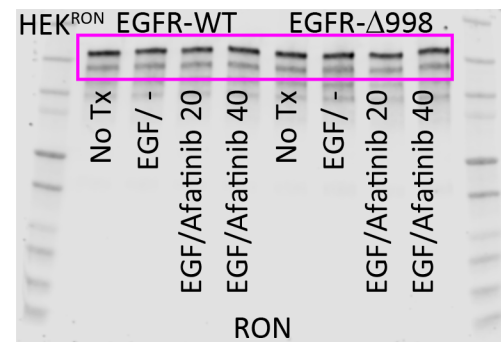

Supplement: fig6-figsupp2-data1 [file elife-63678-fig6-figsupp2-data1-v2.zip]
