# Supplementary material for: EGFR transactivates RON to drive oncogenic crosstalk
Source: eLife. 2021 Nov 25;10:e63678. doi: 10.7554/eLife.63678 (PMC8654365; doi:10.7554/eLife.63678)
Supplement: Figure 1—figure supplement 3—source data 2. [file elife-63678-fig1-figsupp3-data2.xlsx]

## Sheet: Figure 1 - Supplement3
Figure 1 - Figure Supplement 3 - Source Data 1
Compilation - PY's of EGFR - HEK HA-RON ACP-EGFR - Tx 50 nM EGF or 20 nM MSP
Replicate1						Replicate2						Replicate3
	PY20/PY99	EGFR	PY/EGFR	Normalized		whole lysate	PY20/PY99	EGFR	PY/EGFR	Normalized			PY20+PY99	EGFR	PY/EGFR	Normalized			Average	Std dev
No Tx	68.8	2.05	33.561	0.625255		No Tx	55.6	2.8	19.8571	0.317983		No Tx	65	3.54	18.3616	0.534624			0.492621	0.128912
50 nM EGF	99.3	1.85	53.6757	1		50 nM EGF	148	2.37	62.4473	1		50 nM EGF	99.6	2.9	34.3448	1			1	0
20 nM MSP	59.9	1.89	31.6931	0.590456		20 nM MSP	65.8	2.55	25.8039	0.413211		20 nM MSP	41.1	2.9	14.1724	0.412651			0.472106	0.0836864
Replicate1						Replicate2						Replicate3
	PY1068	EGFR	PY1068/EGFR	Normalized		whole lysate	PY1068	EGFR	PY1068/EGFR	Normalized			PY1068	EGFR	PY1068/EGFR	Normalized			Average	Std dev
No Tx	31.4	2.45	12.8163	0.551102		No Tx	26.7	2.31	11.5584	0.327679		No Tx	20.6	2.96	6.95946	0.365066			0.414616	0.0977097
50 nM EGF	60	2.58	23.2558	1		50 nM EGF	70.9	2.01	35.2736	1		50 nM EGF	57	2.99	19.0635	1			1	0
20 nM MSP	39.3	2.66	14.7744	0.635301		20 nM MSP	32.5	2.11	15.4028	0.436667		20 nM MSP	27.4	2.99	9.16388	0.480702			0.517557	0.0851764
Replicate1						Replicate2						Replicate3
	PY845	EGFR	PY845/EGFR	Normalized		whole lysate	PY845	EGFR	PY845/EGFR	Normalized			PY845	EGFR	PY845/EGFR	Normalized			Average	Std dev
No Tx	7.04	3.06	2.30065	0.16867		No Tx	2.63	3.55	0.740845	0.180728		No Tx	4.58	2.79	1.64158	0.182328			0.177242	0.00609663
50 nM EGF	34.1	2.5	13.64	1		50 nM EGF	15.7	3.83	4.09922	1		50 nM EGF	26.2	2.91	9.00344	1			1	0
20 nM MSP	5.8	2.48	2.33871	0.17146		20 nM MSP	2.14	3.25	0.658462	0.160631		20 nM MSP	4.14	3.01	1.37542	0.152766			0.161619	0.00766371
Replicate1						Replicate2						Replicate3
	PY1148	EGFR	PY1148/EGFR	Normalized			PY1148	EGFR	PY1148/EGFR	Normalized			PY1148	EGFR	PY1148/EGFR	Normalized			Average	Std dev
No Tx	19.8	2.22	8.91892	0.47291		No Tx	19.3	2.06	9.36893	0.371678		No Tx	11	3.56	3.08989	0.432845			0.425811	0.0416259
50 nM EGF	43	2.28	18.8596	1		50 nM EGF	42.6	1.69	25.2071	1		50 nM EGF	23.7	3.32	7.13855	1			1	0
20 nM MSP	15.5	1.78	8.70787	0.461719		20 nM MSP	14.7	1.71	8.59649	0.341035		20 nM MSP	8.58	3.25	2.64	0.369823			0.390859	0.0514658
