# Supplementary material for: EGFR transactivates RON to drive oncogenic crosstalk
Source: eLife. 2021 Nov 25;10:e63678. doi: 10.7554/eLife.63678 (PMC8654365; doi:10.7554/eLife.63678)
Supplement: Figure 1—source data 2. [file elife-63678-fig1-data2.xlsx]

## Sheet: Figure 1C
Figure 1 - Source Data 1C
Replicate 1							Replicate 2							Replicate 3
	PY1068	EGFR	PY1068/EGFR	normalized				PY1068	EGFR	PY1068/EGFR	normalized				PY1068	EGFR	PY1068/EGFR	normalized		average	std dev (S)	std dev (P)
No Tx	28	6.74	4.1543	0.429278			No Tx	40.7	7.11	5.72433	0.383475			No Tx	43.9	6.45	6.8062	0.607238		0.47333	0.118207	0.0965158
20 nM EGF	60	6.2	9.67742	1			20 nM EGF	92.7	6.21	14.9275	1			20 nM EGF	74.2	6.62	11.2085	1		1	0	0
20 nM MSP	28.2	7.5	3.76	0.388533			20 nM MSP	44.9	7.09	6.33286	0.42424			20 nM MSP	48.5	6.48	7.48457	0.667761		0.493511	0.151957	0.124072
EGF + MSP	78.1	7.88	9.91117	1.02415			20 nM EGF+MSP	68.2	5.16	13.2171	0.885414			EGF + MSP	68.9	6.46	10.6656	0.95157		0.953713	0.0693946	0.0566605

## Sheet: Figure 1D
Figure 1 - Source Data 1D
Replicate 1						Replicate 2						Replicate 3
																		normalized to MSP
	PY20+PY99	RON	PY/RON	normalized			PY20+PY99	RON	PY/RON	normalized			PY20+PY99	RON	PY/RON	normalized		average	std dev (S)	std dev (P)
No Tx	0.117	1.14	0.102632	0.0580745		No Tx	0.0199	0.373	0.0533512	0.0339314		No Tx	0.0134	0.317	0.0422713	0.0307655		0.0409238	0.014937	0.012196
20 nM EGF	0.845	0.667	1.26687	0.716861		20 nM EGF	0.0872	0.218	0.4	0.2544		20 nM EGF	0.415	0.379	1.09499	0.796943		0.589401	0.29287	0.239127
20 nM MSP	1.64	0.928	1.76724	1		20 nM MSP	0.5	0.318	1.57233	1		20 nM MSP	0.507	0.369	1.37398	1		1	0	0
EGF + MSP	4.69	1.12	4.1875	2.36951		20 nM EGF+MSP	0.937	0.203	4.61576	2.93563		EGF + MSP	1.36	0.317	4.29022	3.12247		2.8092	0.392075	0.320128

## Sheet: Figure 1C 1D Statistics
Compared to NO Treatment								Compared to 20 nM EGF							Compared to 20 nM MSP
Table Analyzed	Copy of PY1068/EGFR							Table Analyzed	Copy of PY1068/EGFR						Table Analyzed	Copy of PY1068/EGFR
Two-way ANOVA								Two-way ANOVA							Two-way ANOVA
Source of Variation	% of total variation	P value						Source of Variation	% of total variation	P value					Source of Variation	% of total variation	P value
Interaction	34.54	< 0.0001						Interaction	34.54	< 0.0001					Interaction	34.54	< 0.0001
Column Factor	56	< 0.0001						Column Factor	56	< 0.0001					ligand	56	< 0.0001
Row Factor	5.73	0.0001						Row Factor	5.73	0.0001					Phosphorylation	5.73	0.0001
Source of Variation	P value summary	Significant?						Source of Variation	P value summary	Significant?					Source of Variation	P value summary	Significant?
Interaction	***	Yes						Interaction	***	Yes					Interaction	***	Yes
Column Factor	***	Yes						Column Factor	***	Yes					ligand	***	Yes
Row Factor	***	Yes						Row Factor	***	Yes					Phosphorylation	***	Yes
Source of Variation	Df	Sum-of-squares	Mean square	F				Source of Variation	Df	Sum-of-squares	Mean square	F			Source of Variation	Df	Sum-of-squares	Mean square	F
Interaction	3	5.217	1.739	49.41				Interaction	3	5.217	1.739	49.41			Interaction	3	5.217	1.739	49.41
Column Factor	3	8.457	2.819	80.09				Column Factor	3	8.457	2.819	80.09			ligand	3	8.457	2.819	80.09
Row Factor	1	0.8652	0.8652	24.58				Row Factor	1	0.8652	0.8652	24.58			Phosphorylation	1	0.8652	0.8652	24.58
Residual	16	0.5632	0.0352					Residual	16	0.5632	0.0352				Residual	16	0.5632	0.0352
Number of missing values	0							Number of missing values	0						Number of missing values	0
Bonferroni posttests								Bonferroni posttests							Bonferroni posttests
No Treatment vs 20 nM EGF								20 nM EGF vs No Treatment							20 nM MSP vs No Treatment
Row Factor	No Treatment	20 nM EGF	Difference	95% CI of diff.				Row Factor	20 nM EGF	No Treatment	Difference	95% CI of diff.			Phosphorylation	20 nM MSP	No Treatment	Difference	95% CI of diff.
PY1068/EGFR	0.4733	1	0.5267	0.06583 to 0.9875				PY1068/EGFR	1	0.4733	-0.5267	-0.9875 to -0.06583			PY1068/EGFR	0.4935	0.4733	-0.02018	-0.4810 to 0.4407
PY/RON	0.04092	0.5894	0.5485	0.08764 to 1.009				PY/RON	0.5894	0.04092	-0.5485	-1.009 to -0.08764			PY/RON	1	0.04092	-0.9591	-1.420 to -0.4982
Row Factor	Difference	t	P value	Summary				Row Factor	Difference	t	P value	Summary			Phosphorylation	Difference	t	P value	Summary
PY1068/EGFR	0.5267	3.438	P<0.01	**				PY1068/EGFR	-0.5267	3.438	P<0.01	**			PY1068/EGFR	-0.02018	0.1317	P > 0.05	ns
PY/RON	0.5485	3.58	P<0.01	**				PY/RON	-0.5485	3.58	P<0.01	**			PY/RON	-0.9591	6.261	P<0.001	***
No Treatment vs 20 nM MSP								20 nM EGF vs 20 nM MSP							20 nM MSP vs 20 nM EGF
Row Factor	No Treatment	20 nM MSP	Difference	95% CI of diff.				Row Factor	20 nM EGF	20 nM MSP	Difference	95% CI of diff.			Phosphorylation	20 nM MSP	20 nM EGF	Difference	95% CI of diff.
PY1068/EGFR	0.4733	0.4935	0.02018	-0.4407 to 0.4810				PY1068/EGFR	1	0.4935	-0.5065	-0.9673 to -0.04565			PY1068/EGFR	0.4935	1	0.5065	0.04565 to 0.9673
PY/RON	0.04092	1	0.9591	0.4982 to 1.420				PY/RON	0.5894	1	0.4106	-0.05024 to 0.8714			PY/RON	1	0.5894	-0.4106	-0.8714 to 0.05024
Row Factor	Difference	t	P value	Summary				Row Factor	Difference	t	P value	Summary			Phosphorylation	Difference	t	P value	Summary
PY1068/EGFR	0.02018	0.1317	P > 0.05	ns				PY1068/EGFR	-0.5065	3.306	P<0.01	**			PY1068/EGFR	0.5065	3.306	P<0.01	**
PY/RON	0.9591	6.261	P<0.001	***				PY/RON	0.4106	2.68	P < 0.05	*			PY/RON	-0.4106	2.68	P < 0.05	*
No Treatment vs 20 nM EGF + 20 nM MSP								20 nM EGF vs 20 nM EGF + 20 nM MSP							20 nM MSP vs 20 nM EGF + 20 nM MSP
Row Factor	No Treatment	20 nM EGF + 20 nM MSP	Difference	95% CI of diff.				Row Factor	20 nM EGF	20 nM EGF + 20 nM MSP	Difference	95% CI of diff.			Phosphorylation	20 nM MSP	20 nM EGF + 20 nM MSP	Difference	95% CI of diff.
PY1068/EGFR	0.4733	0.9537	0.4804	0.01954 to 0.9412				PY1068/EGFR	1	0.9537	-0.04629	-0.5071 to 0.4146			PY1068/EGFR	0.4935	0.9537	0.4602	-0.0006384 to 0.9210
PY/RON	0.04092	2.809	2.768	2.307 to 3.229				PY/RON	0.5894	2.809	2.22	1.759 to 2.681			PY/RON	1	2.809	1.809	1.348 to 2.270
Row Factor	Difference	t	P value	Summary				Row Factor	Difference	t	P value	Summary			Phosphorylation	Difference	t	P value	Summary
PY1068/EGFR	0.4804	3.136	P < 0.05	*				PY1068/EGFR	-0.04629	0.3022	P > 0.05	ns			PY1068/EGFR	0.4602	3.004	P < 0.05	*
PY/RON	2.768	18.07	P<0.001	***				PY/RON	2.22	14.49	P<0.001	***			PY/RON	1.809	11.81	P<0.001	***

## Sheet: Figure 1E
Figure 1 - Data Source 1E
Replicate1							Replicate2							Replicate3
	PY20+PY99	RON	PY/RON		% activation			PY20+PY99	RON	PY/RON		% activation			PY20+PY99	RON	PY/RON		% activation
No Tx (EGF)	0.77	1.8	0.427778	0	0		No Tx (EGF)	1.03	2.35	0.438298	0	0		No Tx (EGF)	0.19	1.32	0.143939	0	0
30 sec EGF	2.13	1.88	1.13298	0.705201	0.241905		30 sec EGF	2.6	2.12	1.22642	0.788117	0.538985		30 sec EGF	0.592	1.58	0.374684	0.230744	0.186228
1 min EGF	8.09	2.42	3.34298	2.9152	1		1 min EGF	2.79	1.92	1.45312	1.01483	0.694029		1 min EGF	1.65	1.27	1.29921	1.15527	0.932394
2 min EGF	5.97	2.19	2.72603	2.29825	0.788368		2 min EGF	3.63	1.91	1.90052	1.46223	1		2 min EGF	1.95	1.41	1.38298	1.23904	1
5 min EGF	4.57	1.56	2.92949	2.50171	0.858161		5 min EGF	2.37	1.81	1.30939	0.871094	0.595732		5 min EGF	0.829	0.941	0.880978	0.737038	0.594847
10 min EGF	2.08	1.39	1.4964	1.06863	0.36657		10 min EGF	2.37	1.55	1.52903	1.09073	0.745941		10 min EGF	0.552	0.731	0.75513	0.611191	0.493278
No Tx (MSP)	1	1.66	0.60241	0	0		No Tx (MSP)	1.37	2.16	0.634259	0	0		No Tx (MSP)	0.176	0.764	0.230366	0	0
30 sec MSP	3.19	1.53	2.08497	1.48256	0.318814		30 sec MSP	2.21	1.64	1.34756	0.713302	0.283792		30 sec MSP	0.608	0.876	0.694064	0.463697	0.209573
1 min MSP	4.18	1.57	2.66242	2.06001	0.442992		1 min MSP	2.83	1.97	1.43655	0.802289	0.319196		1 min MSP	1.68	1.15	1.46087	1.2305	0.556138
2 min MSP	9.98	1.9	5.25263	4.65022	1		2 min MSP	6.16	2.31	2.66667	2.03241	0.808607		2 min MSP	3.64	1.49	2.44295	2.21259	1
5 min MSP	7.36	1.75	4.20571	3.6033	0.774867		5 min MSP	5.54	1.76	3.14773	2.51347	1		5 min MSP	1.66	0.875	1.89714	1.66678	0.753316
10 min MSP	7.48	2	3.74	3.13759	0.674718		10 min MSP	4.86	1.87	2.59893	1.96467	0.781658		10 min MSP	1.98	1.07	1.85047	1.6201	0.73222
Replicate1							Replicate2							Replicate3
	PY1068	EGFR	PY1068/EGFR		% activation			PY1068	EGFR	PY1068/EGFR		% activation			PY1068	EGFR	PY1068/EGFR		% activation
No Tx (EGF)	243	16.6	14.6386	0	0		No Tx (EGF)	20.1	9.26	2.17063	0	0		No Tx (EGF)	15.5	10.9	1.42202	0	0
30 sec EGF	332	16.4	20.2439	5.60535	0.816119		30 sec EGF	35	10.4	3.36538	1.19476	0.676199		30 sec EGF	30.5	11.1	2.74775	1.32573	0.731552
1 min EGF	314	14.6	21.5068	6.8683	1		1 min EGF	41	11.5	3.56522	1.39459	0.789299		1 min EGF	35.9	11.1	3.23423	1.81222	1
2 min EGF	352	17	20.7059	6.06733	0.883382		2 min EGF	44.1	11.2	3.9375	1.76687	1		2 min EGF	69.6	22.5	3.09333	1.67131	0.922249
5 min EGF	269	13.9	19.3525	4.71396	0.686337		5 min EGF	39.8	11.3	3.52212	1.3515	0.764909		5 min EGF	37.3	12.3	3.03252	1.6105	0.888692
10 min EGF	287	15.2	18.8816	4.24302	0.61777		10 min EGF	48.8	11.6	4.2069	2.03627	1.15247		10 min EGF	39.6	13.2	3	1.57798	0.870747

## Sheet: Figure 1E Statistics
Table Analyzed	5nM EGF and 5 nM MSP
Two-way ANOVA
Source of Variation	% of total variation	P value
Interaction	10.17	< 0.0001
Column Factor	4.07	0.0004
Row Factor	79.78	< 0.0001
Source of Variation	P value summary	Significant?
Interaction	***	Yes
Column Factor	***	Yes
Row Factor	***	Yes
Source of Variation	Df	Sum-of-squares	Mean square	F
Interaction	8	6225	778.1	6.378
Column Factor	2	2494	1247	10.22
Row Factor	4	48845	12211	100.1
Residual	30	3660	122
Number of missing values	0
Bonferroni posttests
5 nM EGF - PY/RON vs 5 nM MSP - PY/RON
Row Factor	5 nM EGF - PY/RON	5 nM MSP - PY/RON	Difference	95% CI of diff.
0.0	0	0	0	-28.76 to 28.76
0.5000	32.33	27	-5.333	-34.09 to 23.42
1.000	87.33	44	-43.33	-72.09 to -14.58
2.000	93	93.67	0.6667	-28.09 to 29.42
5.000	68.33	84	15.67	-13.09 to 44.42
Row Factor	Difference	t	P value	Summary
0.0	0	0	P > 0.05	ns
0.5000	-5.333	0.5914	P > 0.05	ns
1.000	-43.33	4.805	P<0.001	***
2.000	0.6667	0.07392	P > 0.05	ns
5.000	15.67	1.737	P > 0.05	ns
5 nM EGF - PY/RON vs 5 nM EGF - PY1068/EGFR
Row Factor	5 nM EGF - PY/RON	5 nM EGF - PY1068/EGFR	Difference	95% CI of diff.
0.0	0	0	0	-28.76 to 28.76
0.5000	32.33	74.33	42	13.24 to 70.76
1.000	87.33	93	5.667	-23.09 to 34.42
2.000	93	93.33	0.3333	-28.42 to 29.09
5.000	68.33	78	9.667	-19.09 to 38.42
Row Factor	Difference	t	P value	Summary
0.0	0	0	P > 0.05	ns
0.5000	42	4.657	P<0.001	***
1.000	5.667	0.6283	P > 0.05	ns
2.000	0.3333	0.03696	P > 0.05	ns
5.000	9.667	1.072	P > 0.05	ns
5 nM MSP - PY/RON vs 5 nM EGF - PY1068/EGFR
Row Factor	5 nM MSP - PY/RON	5 nM EGF - PY1068/EGFR	Difference	95% CI of diff.
0.0	0	0	0	-28.76 to 28.76
0.5000	27	74.33	47.33	18.58 to 76.09
1.000	44	93	49	20.24 to 77.76
2.000	93.67	93.33	-0.3333	-29.09 to 28.42
5.000	84	78	-6	-34.76 to 22.76
Row Factor	Difference	t	P value	Summary
0.0	0	0	P > 0.05	ns
0.5000	47.33	5.248	P<0.001	***
1.000	49	5.433	P<0.001	***
2.000	-0.3333	0.03696	P > 0.05	ns
5.000	-6	0.6653	P > 0.05	ns
