# Supplementary material for: EGFR transactivates RON to drive oncogenic crosstalk
Source: eLife. 2021 Nov 25;10:e63678. doi: 10.7554/eLife.63678 (PMC8654365; doi:10.7554/eLife.63678)
Supplement: Figure 2—figure supplement 1—source data 1. [file elife-63678-fig2-figsupp1-data1.xlsx]

## Sheet: Sheet1
	Figure 2 - Figure Supplement 1 - Source Data 1
	Pearson's Correlation
	EGF488 + EGFR-AF647	EGF647 + HA-AF647	EGFR-AF647 + HA-AF488
	0.87973	0.80459	0.75411
	0.89593	0.57423	0.85705
	0.89664	0.74254	0.84543
	0.83865	0.66999	0.91049
	0.75449	0.81956	0.87002
