# Supplementary material for: EGFR transactivates RON to drive oncogenic crosstalk
Source: eLife. 2021 Nov 25;10:e63678. doi: 10.7554/eLife.63678 (PMC8654365; doi:10.7554/eLife.63678)
Supplement: Figure 2—figure supplement 2—source data 1. [file elife-63678-fig2-figsupp2-data1.xlsx]

## Sheet: Sheet1
Figure 2 - Figure Supplement 2 - Source Data 1															number of RON co-cluster with EGFR	number of EGFR co-cluster with RON	Percent Ron co-cluster with EGFR	Percent EGFR co-cluster with RON
	RON							EGFR
	Size (nm)	# of particles	% clustered	Max three Cluster Sizes			Hopkin's	Size (nm)	# of particles	% clustered	Max three Cluster Sizes			Hopkin's						MEANS	RON						EGFR						Colocalization
No Treatment	6	201	18.9	5	5	4	0.745	12	126	25.4	6	6	5	0.895	31	35	15.4229	27.7778
No Treatment	6	230	31.7	8	6	6	0.775	12	383	30	8	8	6	0.535	103	97	44.7826	25.3264		Condition	Size (nm)	# of particles	% clustered	St Dev	Hopkin's	H-st dev	Size (nm)	# of particles	% clustered	St Dev	Hopkin's	H-st dev	Percent EGFR co-cluster with Ron	stdev	Percent Ron co-cluster with EGFR	stdev
No Treatment	6	272	60.3	10	9	8	0.995	12	1471	75.5	26	19	17	0.535	233	309	85.6618	21.0061		Resting	6	464.5	54.68	16.558	0.929	0.0917969	12	1034.6	59.51	18.7803	0.614	0.131017	32.6796	12.698	67.5594	21.6075
No Treatment	6	354	58.5	10	10	9	0.985	12	843	54.7	16	13	11	0.665	248	231	70.0565	27.4021		2minEGF	6	369.444	70.0111	14.0694	0.985	0.00866025	12	875.111	60.0222	15.7199	0.659615	0.127225	26.8134	3.60529	68.65	12.2615
No Treatment	6	373	58.4	12	11	9	0.985	12	1108	62.3	18	16	14	0.575	268	301	71.8499	27.1661		5minEGF	6	530.231	65.2385	6.96749	0.971154	0.00960769	12	915	57.1692	15.7199	0.659615	0.0764434	35.2701	9.53798	65.8763	9.53798
No Treatment	6	424	62.3	19	9	8	0.975	12	928	57.1	21	17	13	0.585	290	278	68.3962	29.9569
No Treatment	6	450	53.8	11	9	8	0.975	12	1149	64	16	15	15	0.485	365	376	79.8687	32.6672
No Treatment	6	464	65.1	20	18	18	0.985	12	1510	80.7	52	44	41	0.785	364	411	78.1116	26.9685
No Treatment	6	799	65.2	25	18	13	0.945	12	1515	76.6	70	38	34	0.565	654	668	81.8523	44.0924
No Treatment	6	1078	72.6	26	19	16	0.925	12	1313	68.8	30	26	24	0.515	858	846	79.5918	64.4326
2minEGF	6	305	58.7	7	6	6	0.985	12	561	39	12	9	8	0.675	166	131	54.4262	23.3512
2minEGF	6	317	53.3	8	7	7	0.975	12	572	40.7	9	8	8	0.635	169	145	53.3123	25.3497
2minEGF	6	320	82.8	14	11	11	0.995	12	1042	79.2	20	16	15	0.855	274	275	85.625	26.3916
2minEGF	6	331	84.3	25	16	14	0.995	12	961	81.6	48	23	22	0.925	243	228	73.4139	23.7253
2minEGF	6	355	54.9	10	9	7	0.975	12	1014	60.1	11	10	10	0.715	279	309	78.5915	30.4734
2minEGF	6	375	75.2	13	11	10	0.995	12	903	57.8	13	11	10	0.655	218	208	58.1333	23.0343
2minEGF	6	397	55.9	9	8	7	0.975	12	1004	55.6	20	10	10	0.565	306	321	77.0781	31.9721
2minEGF	6	435	77.9	15	10	10	0.985	12	730	47.8	11	10	10	0.575	258	185	59.3103	25.3425
2minEGF	6	490	87.1	33	13	11	0.985	12	1089	78.4	32	31	30	0.825	382	345	77.9592	31.6804
5minEGF	6	328	54	10	10	9	0.975	12	487	34.9	11	10	9	0.555	152	109	46.3415	22.3819
5minEGF	6	346	60.7	8	8	7	0.985	12	558	40.7	15	10	9	0.655	173	143	50	25.6272
5minEGF	6	355	56.3	18	12	9	0.985	12	493	36.1	13	10	10	0.555	140	109	39.4366	22.1095
5minEGF	6	361	55.4	15	8	8	0.975	12	531	38	12	9	8	0.675	168	137	46.5374	25.8004
5minEGF	6	468	63.2	10	7	7	0.975	12	889	62.5	15	12	11	0.765	317	301	67.735	33.8583
5minEGF	6	489	63.8	12	7	7	0.965	12	958	64.9	16	13	11	0.745	315	306	64.4172	31.9415
5minEGF	6	520	66.2	8	8	8	0.975	12	868	56.8	15	14	14	0.715	371	319	71.3462	36.7512
5minEGF	6	532	69.4	11	9	9	0.975	12	854	53.6	10	10	9	0.575	370	322	69.5489	37.7049
5minEGF	6	562	69.4	12	9	8	0.975	12	986	62.6	28	18	16	0.775	435	373	77.4021	37.8296
5minEGF	6	576	73.1	12	11	9	0.965	12	985	60.6	14	13	11	0.655	419	389	72.7431	39.4924
5minEGF	6	747	74.7	18	12	12	0.965	12	1353	77.5	35	17	16	0.645	626	653	83.8019	48.2631
5minEGF	6	776	70.4	17	11	11	0.955	12	1443	76	21	21	19	0.675	637	663	82.0876	45.9459
5minEGF	6	833	71.5	22	18	16	0.955	12	1490	79	33	32	29	0.585	708	757	84.994	50.8054
