# Supplementary material for: EGFR transactivates RON to drive oncogenic crosstalk
Source: eLife. 2021 Nov 25;10:e63678. doi: 10.7554/eLife.63678 (PMC8654365; doi:10.7554/eLife.63678)
Supplement: Figure 3—figure supplement 1—source data 1. [file elife-63678-fig3-figsupp1-data1.xlsx]

## Sheet: Figure 3 -Supplement 1B
	Figure 3 - Figure Supplement 1 - Source Data 1
	A431 HA RON	5 nM MSP	20 nM MSP	5 nM EGF	50 nM EGF			A431 HA RON	5 nM MSP	20 nM MSP	5 nM EGF	50 nM EGF
	0.0359241	0.00894521	0.0166565	0.0100424	0.00945248		Diffusion	0.0366301	0.0278085	0.0250428	0.01844	0.0227994
	0.0180442	0.0149494	0.0169582	0.0155513	0.0108425		Error	0.000924742	0.000625633	0.000731741	0.000479044	0.000620433
	0.00843923	0.0154635	0.0117201	0.0180652	0.0136657
	0.0470748	0.0170947	0.0164259	0.0128783	0.00969023
	0.062613	0.0123392	0.0277246	0.0210782	0.0245963
	0.0130679	0.0212406	0.0427019	0.0103461	0.0136159
	0.0187095	0.0316754	0.0478579	0.0489939	0.0100866
	0.0368847	0.0317026	0.0181877	0.031046	0.0156903
	0.0259397	0.00984925	0.00965857	0.0691152	0.0156798
	0.0109631	0.0135915	0.0226022	0.0208357	0.0430495
	0.0082503	0.0162163	0.0262116	0.0169336	0.016726
	0.0501358	0.00882471	0.0138425	0.00948469	0.0227247
	0.0158738	0.0421703	0.0322595	0.0203513	0.0145637
	0.0396849	0.00851865	0.0232194	0.0167058	0.0119794
	0.0246401	0.0370465	0.0128266	0.0134243	0.00950219
	0.0419087	0.0579682	0.0245831	0.0120824	0.0115733
	0.045762	0.0430299	0.0415452	0.0188799	0.0366091
	0.0104129	0.00943337	0.0313481	0.00825554	0.0144339
	0.022864	0.00823276	0.0185273	0.00992202	0.0237491
	0.0118367	0.0189331	0.0461904	0.0198313	0.0323017
	0.0478144	0.00869533		0.0116532	0.0120116
	0.00950554	0.00981985		0.0255564	0.0206642
	0.0385984	0.0294073		0.0305813	0.00874824
	0.0571336	0.0337638		0.0117003	0.016482
	0.0214054	0.0104333		0.0287427	0.0303839
	0.039862	0.026089		0.0154167	0.0361331
	0.0138327	0.0149149		0.0135532	0.0383235
	0.0177526	0.015163		0.021737	0.0117338
	0.0572681	0.0441124		0.02007	0.0304159
	0.0260239	0.0110402		0.0109836	0.018385
	0.0301492	0.0152944		0.013611	0.0395009
	0.0355587	0.0389055		0.0126714	0.00924978
	0.0375548	0.0477062		0.013811	0.0261434
	0.0529499	0.0258955		0.0251533	0.0102127
	0.0327998	0.0459277		0.0120143	0.0317526
	0.0554077	0.035548		0.0228839	0.0253224
	0.018494	0.061523		0.0127646	0.00904297
	0.0419978	0.0262364		0.0113593	0.026157
	0.0432408	0.0278382		0.025745	0.0198579
	0.00896754	0.0359754		0.0180119	0.0393022
	0.0336344	0.0529856		0.0222289	0.0556513
	0.0343276	0.0644268		0.021117	0.0617562
	0.0165333	0.0290435		0.023332	0.0206216
	0.0201909	0.0252504		0.0128649	0.040059
	0.0585322	0.0613815		0.018844	0.0494048
	0.0399766	0.0442508		0.0269233	0.0119233
	0.0425605	0.0133072		0.0140761	0.022048
	0.0252298	0.0368594		0.0199128	0.0099035
	0.0357943	0.014382			0.0186253
	0.0285092	0.0498305			0.0151728
	0.0169001	0.0097292			0.0223158
	0.0104156	0.0233175			0.0228309
	0.0285863	0.0103254			0.0225588
	0.0110353	0.0151678			0.021969
	0.0113416	0.0338744			0.0120641
	0.0109687	0.0415425			0.0186843
	0.0787658	0.0396223			0.0417192
	0.0584464				0.0120116
	0.0277976				0.017042
	0.0142181				0.0471917
	0.0411109				0.0206642
	0.0258469				0.00874824
	0.0366128				0.016482
	0.0206727				0.0303839
	0.0446794				0.0121746
	0.0317547				0.0145447
	0.0442568				0.02268
	0.0526661				0.0336113
	0.0421034				0.0236886
	0.0481119				0.022218
	0.0245173				0.00936264
	0.059002
	0.0634558
	0.03634
	0.0499735
	0.0465127
	0.0350447
	0.0355349
	0.0174295
	0.0140447
	0.0231917
	0.0296436
	0.0280455
	0.0304517
	0.0327039
	0.051629
	0.0497459
	0.0312148
	0.0556733
	0.0790179
	0.0555986
	0.0319533
	0.0310175
	0.030003
	0.0472399
	0.0297799
	0.0658006
	0.0600672
	0.0607122
	0.0645191
	0.0238348
	0.0598501
	0.0492131
	0.0527866
	0.0329266
	0.021741
	0.0201545
	0.0242536
	0.0199155
	0.0238037
	0.0768884
	0.0516093
	0.0341426
	0.0189419
	0.018794
	0.0448163
	0.0162394
	0.03104
	0.0390693
	0.0217169
	0.0317617
	0.0251
	0.0334519
	0.0748048
	0.0224812
	0.0197594
	0.0368824
	0.030833
	0.0262224
	0.0339801
	0.0451391
	0.0264632
	0.0244609
	0.0228796
	0.0432885
	0.0436432
	0.0332266
	0.0557179
	0.0405031
	0.0356816
	0.029617
	0.0271414
	0.0300001
	0.0459507
	0.06891
	0.0312979
	0.0383861
	0.0470179
	0.0341807
	0.0381761
	0.0293501
	0.018296
	0.0330746
	0.0311533
	0.0426829
	0.0545663
	0.0434857
	0.0688407
	0.0308918
	0.0652685
	0.0478178
	0.0629347
	0.0484723
	0.0510743
	0.0536155
	0.0207155
	0.0248338
	0.0645115
	0.0335482
	0.0198284
	0.0700487
