# Supplementary material for: EGFR transactivates RON to drive oncogenic crosstalk
Source: eLife. 2021 Nov 25;10:e63678. doi: 10.7554/eLife.63678 (PMC8654365; doi:10.7554/eLife.63678)
Supplement: Figure 3—figure supplement 2—source data 1. [file elife-63678-fig3-figsupp2-data1.xlsx]

## Sheet: Figure 3 - Supplement 2A
	Figure 3 - Supplement 2A - Source Data
	Figure 3 - Supplement 2 - Part A
			Pearson's Correlation
			HAFab/EEA1	EGF/EEA1
	Image 001	Cell 1	0.0974	0.31918
		Cell 2	-0.02695	0.3638
		Cell 3	0.0702	0.48662
		Cell 4	0.23455	0.17685
		Cell 5	0.0497	0.20473
		Cell 6	-0.00853	0.38559
		Cell 7	0.06978	0.67537
		Cell 8	-0.02595	0.33909
		Cell 9	0.08129	0.35987
	Image 004	Cell 1	0.1254	0.22583
		Cell 2	0.10828	0.20123
		Cell 3	0.07285	0.17521
		Cell 4	0.21965	0.25372
		Cell 5	0.08356	0.12864
		Cell 6	0.06756	0.33754
		Cell 7	0.12676	0.36161
	Image 003	Cell 1	0.0231	0.27515
		Cell 2	0.18128	0.26344
		Cell 3	0.01137	0.1293
		Cell 4	0.06629	0.14979
		Cell 5	0.11548	0.35982
		Cell 6	0.03153	0.23061
		Cell 7	0.04747	0.43332
	Image 002	Cell 1	0.12643	0.39107
		Cell 2	0.15622	0.17092
		Cell 3	0.00251	0.04211
		Cell 4	0.1361	0.08568
		Cell 5	0.16313	0.35282
		Cell 6	0.16737	0.14399
		Mean	0.0887528	0.276652
		STD Dev	0.0689403	0.135347
		n=29
		T-Test	Pvalue	4.63181e-08

## Sheet: Figure 3 - Supplement 2B
	Figure 3 - Supplement 2B - Source Data
	Figure 3 - Supplement 2 - Part B
			Pearson's Correlation
			anti-HA/EEA1	EGFR/EEA1
	No Tx		0.0419	0.01764
			0.15626	0.31577
			0.07106	0.23251
			0.05576	0.16364
			0.02057	0.01527
			0.01375	0.02776
			0.11618	0.09274
			-0.03449	0.21932
			-0.01614	0.05489
		Mean	0.0472056	0.126616
		STD Dev	0.0610699	0.110281
		n=9
		T-Test	Pvalue	0.0822262
	50 nM EGF		0.0029	0.49638
			0.03041	0.37938
			-0.03883	0.48353
			-0.0566	0.41633
			0.03846	0.3275
			0.03864	0.38031
			0.0335	0.26636
			0.00433	0.38387
			0.05818	0.2056
		Mean	0.0123322	0.371029
		STD Dev	0.0383632	0.0941803
		n=9
		T-Test	Pvalue	5.84637e-07
