# Supplementary material for: EGFR transactivates RON to drive oncogenic crosstalk
Source: eLife. 2021 Nov 25;10:e63678. doi: 10.7554/eLife.63678 (PMC8654365; doi:10.7554/eLife.63678)
Supplement: Figure 3—source data 1. [file elife-63678-fig3-data1.xlsx]

## Sheet: Figure 3B
	Figure 3 - Source Data 1
	A431 HA RON	5 nM MSP	50 nM EGF	Pd153035	Pd153035 + 50 nM EGF			A431 HA RON	5 nM MSP	50 nM EGF	Pd153035	Pd153035 + 50 nM EGF
	0.0268298	0.0281029	0.0231185	0.038819	0.0289043		Diffusion	0.0319	0.0276	0.019	0.0358	0.0333
	0.0476743	0.0298794	0.023384	0.0341164	0.038809		Error	0.0015	0.0015	0.0011	0.0014	0.0013
	0.0258244	0.0323876	0.0203347	0.0480842	0.0406591
	0.0551275	0.0254457	0.0285781	0.0229181	0.0307341
	0.0423577	0.0289717	0.0334143	0.0216564	0.0379996
	0.032568	0.0338098	0.0269003	0.0535866	0.0189578
	0.0414721	0.034494	0.0211907	0.0510436	0.0284873
	0.0468857	0.0400166	0.0187446	0.0248175	0.0212379
	0.0149456	0.0329486	0.0267649	0.0158023	0.0256215
	0.0392433	0.0147545	0.0220886	0.0557938	0.027047
	0.0279374	0.0403552	0.0202951	0.0721767	0.0462802
	0.0355705	0.0309677	0.0292939	0.0163777	0.0137782
	0.0413767	0.0223372	0.01257	0.029884	0.0238104
	0.0419375	0.0207772	0.015294	0.0359985	0.0648548
	0.0194637	0.0334554	0.0164141	0.0287512	0.0402499
	0.0316323	0.0253811	0.0161876	0.035148	0.0640424
	0.019974	0.0319933	0.00865911	0.027095	0.0315577
	0.0258716	0.0259136	0.0135008	0.024983	0.0462412
	0.0296072	0.0306648	0.00854617	0.0545166	0.0750225
	0.0455415	0.0373353	0.0111644	0.0378342	0.0144517
	0.0497204	0.0347423	0.0113923	0.0376246	0.0349149
	0.0163535	0.0401202	0.00917411	0.0441648	0.0130349
	0.0375033	0.0351249	0.0156705	0.0262904	0.0118288
	0.0548282	0.0140013	0.00565651	0.0617525	0.028994
	0.0185644	0.0376765	0.0193682	0.0461849	0.0286768
	0.0240321	0.0225709	0.0164672	0.0481387	0.0168796
	0.018799	0.0389466	0.0220813	0.0153625	0.016758
	0.0262085	0.0308614	0.013138	0.0101032	0.0164835
	0.0273355	0.0361256	0.0109164	0.0434782	0.0284636
	0.0420539	0.0147259	0.0188095	0.0439392	0.0191982
	0.0252962	0.0321667	0.0171597	0.0376668	0.024301
	0.0129375	0.023144	0.0211088	0.0780093	0.0439041
	0.0184131	0.0474482	0.016624	0.0360066	0.0780814
	0.0191314	0.037114	0.0162006	0.029887	0.0664955
	0.0431987	0.0388326	0.0124948	0.0183789	0.0383377
	0.0412027	0.021028	0.0110226	0.00721514	0.0228189
	0.0191182	0.0191279	0.0126439	0.0475967	0.0301727
	0.0203131	0.0332064	0.0187821	0.0338797	0.032494
	0.0485257	0.0510229	0.0228429	0.00871162	0.0610314
	0.0277201	0.0552474	0.0161104		0.0442448
	0.0267789	0.014901	0.0126859		0.0101389
	0.019308	0.0159035	0.0232989		0.0298526
	0.0204039	0.0282772	0.0187456		0.0389497
	0.0291586	0.0441313	0.0171625		0.0372547
	0.0148409	0.0282009	0.0178332		0.0253923
	0.024579	0.0124781	0.00784323		0.0335276
	0.0255756	0.032349	0.0145146		0.0720346
	0.0472232	0.0322822	0.0427659		0.00820087
	0.027028	0.0371242	0.0357494		0.0301079
	0.0298487	0.0318977	0.0162243		0.0364832
	0.0325995	0.0357017	0.0277		0.0394488
	0.0462182	0.0242516	0.0169391		0.034354
	0.0253991	0.0241794	0.0097198		0.0219687
	0.0290409	0.0315224	0.0645648		0.0429482
	0.0423807	0.029287	0.0423576		0.0494145
	0.0130385	0.0259047	0.0130682		0.0465463
	0.029957	0.0188051	0.0368248		0.0546687
	0.0153232	0.0518166	0.041387		0.0239475
	0.0167793	0.0296244	0.0102601		0.0274945
	0.0225309	0.0344085	0.0539484		0.0593454
	0.0154604	0.0248799	0.0220839		0.0506034
	0.0241974	0.0366632	0.0151466		0.0208665
	0.0403284	0.0222867	0.0216075		0.0114165
	0.0131563	0.0494432	0.0254385		0.0265597
	0.0232641	0.0434761	0.0267273		0.0472881
	0.0166882	0.0406518	0.0148899		0.0275534
	0.0299633	0.0204509	0.0174846		0.0396572
	0.0385094	0.0268853	0.0130557		0.0595173
	0.0359039	0.0245249	0.0110939		0.0443
	0.0403052	0.0309664	0.00984116		0.0423454
	0.0310623	0.0267641	0.00424213		0.0135745
	0.0402875	0.0179274	0.0129204		0.00546339
	0.034702	0.0187034	0.0184131		0.0325844
	0.0204822	0.0290697	0.0308852		0.011343
	0.0295353	0.0221884	0.00852883		0.0379334
	0.0175583	0.0256153	0.011166		0.0301685
	0.0237597	0.0271961	0.0299489		0.013005
	0.0325718	0.0337611	0.0228567		0.00768803
	0.0271024	0.0291539	0.00911048		0.0147302
	0.0366709	0.0253446	0.0496753		0.0210081
	0.0234804	0.0153215	0.0190835		0.0172937
	0.0406385	0.0352362	0.0158351		0.0406473
	0.0225343	0.0266557	0.00870775
	0.038819	0.0198203	0.039255
	0.0341164	0.0229495	0.0174656
	0.0480842	0.0305798	0.0149179
	0.0229181	0.0280866	0.00714884
	0.0216564	0.0331187	0.0191476
	0.0535866	0.0160193	0.00966227
	0.0510436	0.0461402	0.0493805
	0.0248175	0.0232618	0.0160367
	0.0158023	0.0250146	0.0372666
	0.0557938	0.0233666	0.035433
	0.0721767	0.0236085	0.0251535
	0.0163777	0.0242101	0.019765
	0.029884	0.0348996	0.0317874
	0.0359985	0.0325031	0.0251055
	0.0287512	0.0237961	0.0217587
	0.035148	0.0290516	0.0272175
	0.027095	0.0329711	0.0138027
	0.024983	0.0269506	0.00683831
	0.0545166	0.0452434	0.0158733
	0.0378342	0.0145076	0.0174996
	0.0376246	0.0397884	0.00196451
	0.0441648	0.0489804	0.00513854
	0.0262904	0.0345648	0.0159377
	0.0621563	0.00803557	0.0228127
	0.0480131	0.0078672	0.0121731
	0.017289	0.030986	0.0290255
	0.0224676	0.0194463	0.0203914
	0.0524343	0.0204477	0.0358473
	0.0444174	0.0441789	0.0222944
	0.0394103	0.0166973	0.0140799
	0.0467492	0.0111261	0.00889193
	0.0337262	0.0217564	0.0366388
	0.0309947	0.0577149	0.006284
	0.0317507	0.0308287	0.00507275
	0.0464727	0.0204504	0.0385651
	0.0487525	0.0333724	0.0267571
	0.0380915	0.027261	0.0215738
	0.0183589	0.0305735	0.0221399
	0.0390359	0.0190784	0.0154825
	0.0222435	0.0361284	0.0242227
	0.051046	0.0295794	0.0174717
	0.0119945	0.0313391	0.0321486
	0.016662	0.0321647	0.0347195
	0.0438197	0.0363407	0.0289723
	0.0366451	0.0235938	0.0187164
	0.0253181	0.0419399	0.0451727
	0.0619374	0.0331116	0.0231339
	0.0379722	0.0266673	0.0294921
	0.0513606	0.0215975	0.0257019
	0.023924	0.0245646	0.0155846
	0.0342995	0.0521753	0.0170897
	0.0451365	0.0334115	0.0197841
	0.0677437	0.0236859	0.0452605
	0.0304781	0.0413199	0.00933847
	0.0319185	0.0228869	0.00741714
	0.0623117	0.0208535	0.0133535
	0.0411973	0.0294532	0.0138129
	0.0347421	0.0183006	0.0201794
	0.0282712	0.0169916	0.0224026
	0.0511656	0.0324271	0.0244317
	0.0406916	0.0392723	0.0165779
	0.0162805	0.0522887	0.0139328
	0.02748	0.0255227	0.0188926
	0.0361621	0.0370079	0.0237426
	0.029426	0.0394973	0.00959344
	0.0590697	0.0277723	0.00835644
	0.0616109	0.0774872	0.0211417
	0.0217374	0.0355457	0.0217851
	0.0106021	0.048279	0.0175991
	0.028477	0.0301188	0.0345698
	0.0304272	0.0487268	0.0107349
	0.0170177	0.0385937	0.0135964
	0.0292087	0.0630581	0.0273262
	0.0264905	0.0629971	0.0223978
	0.0183561	0.0332266	0.0296193
	0.0543242	0.0141813	0.0285495
	0.0281741	0.0259289	0.0252276
	0.0383737	0.024189	0.0250172
	0.0314767	0.0412603	0.0268138
	0.0277838	0.0450667	0.0248893
	0.0301383	0.0236709	0.0266228
	0.022646	0.0308986	0.0154926
	0.026521	0.0578117	0.0151567
	0.0368261	0.0524618	0.0194498
	0.04997	0.0150962	0.0262166
	0.033159	0.0462709	0.0158048
	0.0211602	0.020934	0.0234632
	0.0144593	0.0274797	0.0312208
	0.0216528	0.0299072	0.0212101
	0.0406267	0.034816	0.0148398
	0.0364883	0.0617269	0.019183
	0.0262671	0.0231742	0.015946
	0.038096	0.0458735	0.0105996
	0.0377133	0.0301997	0.0213398
	0.0456861	0.0502857	0.0117002
	0.0485703	0.0549853	0.0113834
	0.0223807	0.0249193	0.0120012
	0.038735	0.0232637	0.0120012
	0.0337081	0.0208211	0.019448
	0.0278984	0.0444787	0.01887
	0.0193067	0.0385198	0.0215665
	0.0247834	0.0266719	0.0215665
	0.0203396	0.0270827	0.0147516
	0.0313417	0.0357032	0.0188135
	0.0247773	0.0435915	0.0188135
	0.0508233	0.0295899	0.0130698
	0.0621873	0.0326881	0.012034
	0.0690528	0.0496754	0.0139723
	0.0565316	0.049095	0.0224359
	0.0484344	0.0246017	0.0224359
	0.0223238	0.0534624	0.0203891
	0.0498985	0.0303729	0.0452815
	0.0392024	0.0220777	0.0173504
	0.0397133	0.0287447	0.0298602
	0.0223679	0.0305806	0.0091073
	0.0443771	0.0310615	0.0138037
	0.0408817	0.0396449	0.0329676
	0.0332245	0.0361578	0.017512
	0.0100237	0.0165151	0.00549842
	0.0153687	0.0375942	0.0263201
	0.0296224	0.0315291	0.0375421
	0.041117	0.0445612	0.0240144
	0.0254824	0.0386041	0.0146614
	0.0342088	0.0679966	0.0143881
	0.0263446	0.0189689	0.0231879
	0.0280151	0.0149448	0.0249967
	0.0386188	0.0181609	0.022954
	0.025956	0.0391075	0.0229415
	0.03647	0.0297028	0.0144915
	0.0367275	0.0342831	0.00423298
	0.0292917	0.0290169	0.010763
	0.0548591	0.016086	0.0374709
	0.0582669	0.0124022	0.0151757
	0.0432594	0.0237372	0.0142276
	0.0359994	0.0194703	0.024152
	0.032449	0.0199973	0.0110552
	0.0265399	0.00510239	0.02051
	0.0333981	0.0359799	0.00961838
	0.0265738	0.0390298	0.0055865
	0.0302912	0.0131468	0.0126864
	0.0192007	0.0268108	0.024152
	0.0137145	0.013901	0.0521179
	0.0426791	0.0239025	0.0197962
	0.0484104	0.0101222	0.0181455
	0.0188462	0.021361	0.0200208
	0.0379086	0.0241589	0.0194291
	0.0284209	0.013701	0.0170835
	0.0541316	0.0153324	0.00169321
	0.0156515	0.0403232	0.0228472
	0.0624621	0.0106042	0.0630611
	0.0254747	0.0156606	0.0245041
	0.0444173	0.0231658	0.0099481
	0.0177281	0.0215889	0.00687642
	0.0374132	0.00654614	0.0105433
	0.0657321	0.0115526	0.0430549
	0.0195152	0.0200697	0.0158126
	0.0561464	0.0129979	0.0215758
	0.0347056	0.0148713	0.0110053
	0.0346386	0.0119132	0.0170888
	0.0501422	0.0197685	0.0186033
	0.025987	0.0303304	0.0193063
	0.0466217	0.0245053	0.0178198
	0.0616087	0.023212	0.0235461
	0.0650856	0.0117498	0.0171474
	0.0571431	0.013978	0.00838865
	0.0264175	0.0179318	0.0257663
	0.0454505	0.0431882	0.00973438
	0.0392034	0.0153458	0.0114727
	0.0110056	0.0465691	0.0265292
	0.0315444	0.0618303	0.0217814
	0.0101739	0.0316083	0.0201146
	0.0274148	0.0327023	0.0286281
	0.028845	0.010319	0.0119904
	0.0474793	0.026387	0.0177279
	0.0359587	0.0144467	0.0389363
	0.0298797	0.0202257	0.00722695
	0.0296856	0.0304285	0.0257247
	0.043365	0.0510604	0.0317322
	0.0176112	0.0263167	0.0225674
	0.0317753	0.0227099	0.0144187
	0.0290668	0.00311951	0.0273062
	0.0330548	0.0392518	0.0165418
	0.0360269	0.0297206	0.0180573
	0.0309435	0.0353679	0.00892313
	0.0499068	0.0161559	0.0165745
	0.0171555	0.0106224	0.00876532
	0.0223166	0.027233	0.0107462
	0.0393055	0.0347233	0.0146728
	0.0402571	0.0283867	0.0198346
	0.0367819	0.0202626	0.0197895
	0.0219844	0.022558	0.038541
	0.0358817	0.0226861	0.0126018
	0.0547178	0.0131197	0.0270782
	0.0646447	0.0214398	0.0241077
	0.0417462	0.0397555	0.0167061
	0.0436441	0.0219973	0.0226176
	0.0372341	0.023343	0.0121653
	0.0461482	0.0198183	0.0136262
	0.0408787	0.0168419	0.0226093
	0.0143214	0.0125727	0.0341299
	0.0494784	0.031412	0.00619733
	0.0398939	0.0197328	0.0074863
	0.00521655	0.0418847	0.0115577
	0.0257129	0.0125723	0.027885
	0.0235727	0.0133916	0.019331
	0.0634288	0.00745204	0.0175464
	0.0238436	0.0159777	0.0165729
	0.0132273	0.0168151	0.0158002
	0.03139	0.0358501	0.0060217
	0.0195854	0.0236232	0.0144534
	0.0419222	0.0227781	0.0176317
	0.0205933	0.0286933	0.0103685
	0.0375124	0.0119635	0.0171664
	0.0360901	0.0286933	0.0207186
	0.0263133	0.0111399	0.0285514
	0.0417492	0.0371499	0.0139036
	0.0269738	0.00849099	0.0200411
	0.0244223	0.0362796	0.0150917
	0.0148516	0.0211427	0.0274502
	0.0296335	0.0325002	0.0171812
	0.0246728	0.0382855	0.0118895
	0.0248078	0.0180349	0.026449
	0.0288759	0.024952	0.0190816
	0.0256829	0.0211873	0.0152468
	0.0355427	0.0142037	0.0145728
	0.0316689	0.00838659	0.0153302
	0.0161996	0.0063153	0.0131595
	0.0288421	0.0208166	0.0236386
	0.0207424	0.0154845	0.0177027
	0.0243899	0.0228611	0.0258707
	0.0401718	0.011106	0.0177845
	0.0169871	0.0195587	0.0184995
	0.0110011	0.0173477	0.0080632
	0.0292148	0.0258083	0.0139465
	0.0280803	0.0103374	0.0250711
	0.0190787	0.0107761	0.0163194
	0.0209983	0.012296	0.0262209
	0.013681	0.0337167	0.0114448
	0.016929	0.0248641	0.0188401
	0.02051	0.0178141	0.00902681
	0.0289115	0.0222515	0.0081468
	0.0327005	0.0188903	0.0187147
	0.0253322	0.0316507	0.0298286
	0.00975198	0.0118365	0.0236238
	0.0471555	0.00552623	0.0154147
	0.0339216	0.015877	0.0100463
	0.0385355	0.0190122	0.00880707
	0.0392503	0.0080025	0.0136127
	0.0396201	0.0236953	0.0154018
	0.0262528	0.0354225	0.0410153
	0.0163947	0.0158238	0.0145511
	0.0106943	0.0268523	0.0215358
	0.0233428	0.0201631	0.0106447
	0.00434638	0.0226686	0.0222772
	0.0286234	0.0127545	0.016692
	0.0362265	0.0119675	0.00699229
	0.0107602	0.032287	0.0244257
	0.0170045	0.0112319	0.0143737
	0.0340534	0.0202517	0.029691
	0.0515046	0.016553	0.0341446
	0.0328472	0.00387011	0.0150393
	0.0389497	0.0234459	0.00932579
	0.0175546	0.0248836	0.0112128
	0.0617525	0.0123889	0.0153478
	0.0461849	0.00547144	0.0147634
	0.0481387	0.0101628	0.0201235
	0.0153625	0.043479	0.0233678
	0.0101032	0.0249543	0.0325239
	0.0434782	0.0419804	0.0243049
	0.0439392	0.0387146	0.0158638
	0.0376668	0.0235953	0.0162016
	0.0780093	0.0106704	0.0147869
	0.0360066	0.0301825	0.0400864
	0.029887	0.0771492	0.0109752
	0.0183789		0.0169429
	0.00721514		0.0190232
	0.0475967		0.0280767
	0.0338797		0.040041
	0.00871162		0.00819694
	0.024905		0.00668198
	0.0398689		0.00597562
	0.0253292		0.0225878
	0.025983		0.0282583
	0.0327916		0.015946
	0.024334		0.0217024
	0.0226295		0.0147913
	0.0323498		0.0148558
	0.0112729		0.0072172
	0.0422566		0.00712904
	0.0185288		0.0110852
	0.0503608		0.016397
	0.0328447		0.0140715
	0.0427833		0.0102194
	0.0341632		0.00106654
	0.0340814		0.0181192
	0.0315957		0.00849063
	0.0360688		0.0175405
	0.0653892		0.016369
	0.0108288		0.021074
	0.0412211		0.0147946
	0.0509494		0.0254455
	0.0154711		0.0234327
	0.0163383		0.0209172
	0.0315144		0.0121244
	0.0609693		0.0341499
	0.015691		0.0106089
	0.0655191		0.0118514
	0.0341514		0.00584625
	0.0196326		0.052663
	0.0156932		0.0441823
	0.0269984		0.0223734
	0.0277546		0.0114893
	0.0295681		0.0212099
	0.00829122		0.0199673
	0.0132704		0.0109894
	0.0366379		0.0180057
	0.0223611		0.0234041
	0.0317521		0.0172808
	0.0336146		0.0288034
	0.0434154		0.0192233
	0.024467		0.0120559
	0.00632533		0.0195706
	0.0256598		0.0135702
	0.00718074		0.0284093
	0.0158881		0.0359079
	0.0158881		0.012804
	0.0178392		0.0273513
	0.013494		0.0324621
	0.00754134		0.0485222
	0.057074		0.0164685
	0.038322		0.0117005
	0.0221352		0.0117033
	0.0226531		0.00760776
	0.0263677		0.0145696
	0.0234601		0.0120137
	0.0197516		0.00589819
	0.0241642		0.00411783
	0.0198311		0.018726
	0.0301475		0.00692718
	0.0375969		0.0186064
	0.0567666		0.0151015
	0.0252895		0.0124845
	0.0210353		0.0173589
	0.0298772		0.00616096
	0.0243858		0.0133519
	0.0337927		0.0102621
	0.0163186		0.0289674
	0.0355369		0.0114356
	0.0204682		0.0120881
	0.0491989		0.0306864
	0.0317479		0.0246708
	0.0108635		0.0139113
	0.0354587		0.0109886
	0.0216485		0.0381588
	0.0327803		0.010248
	0.0212645		0.0179511
	0.0616419		0.0107137
	0.0392022		0.00943181
	0.0112489		0.0121757
	0.0294363		0.00496991
	0.0360988		0.02053
	0.043135		0.0167948
	0.0458015		0.0456054
	0.0453391		0.0161077
	0.040408		0.0219797
	0.0477298		0.012928
	0.0202528		0.010696
	0.0314897		0.0112429
	0.0799395		0.0306198
	0.0192391		0.0283495
	0.0411192		0.0100234
	0.0322213		0.0103789
	0.0429013		0.0145122
	0.0412063		0.0210684
	0.0655238		0.0196125
	0.0251869		0.011759
	0.0256552		0.033576
	0.0297985		0.0219208
	0.0397526		0.0165621
	0.0646959		0.0226214
	0.0221401		0.00744567
	0.0364267		0.00809916
	0.0306884		0.0198527
	0.0231046		0.0185362
	0.0425438		0.0231672
	0.0214166		0.0224823
	0.0232147		0.0182611
	0.00732955		0.0579382
	0.0337435		0.0215071
	0.0644408		0.0215071
			0.0145906
			0.00300731
			0.0191568
			0.024968
			0.0133838
			0.01747
			0.0292702
			0.0332498
			0.0139088
			0.0256422
			0.0175336
			0.0235331
			0.0142692
			0.0321172
			0.0054421
			0.0277189
			0.0198465
			0.0197046
			0.0288161
			0.018389
			0.00468665
			0.0216609
			0.0285408
			0.0206024
			0.0110651
			0.0167025
			0.013444
			0.011524
			0.00688702
			0.0409133
			0.0143864
			0.021526
			0.0400178
			0.0113955
			0.0181814
			0.0138414
			0.0212332
			0.011351
			0.0242281
			0.033863
			0.0333412
			0.011613
			0.0118117
			0.0104594
