# Supplementary material for: EGFR transactivates RON to drive oncogenic crosstalk
Source: eLife. 2021 Nov 25;10:e63678. doi: 10.7554/eLife.63678 (PMC8654365; doi:10.7554/eLife.63678)
Supplement: Figure 5—figure supplement 1—source data 2. [file elife-63678-fig5-figsupp1-data2.xlsx]

## Sheet: Figure 5 - Supplement 1
Figure 5 - Figure Supplement 1 - Source Data
Replicate1						Replicate2						Replicate3						Replicate4
	PY20 + PY99	RON	PY/RON	normalized			PY20 + PY99	RON	PY/RON	normalized			PY20 + PY99	RON	PY/RON	normalized			PY20 + PY99	RON	PY/RON	normalized		average	std dev (S)	Std dev (P)
No Tx	0.116	2.32	0.05	0.495066		No Tx	0.0422	3.43	0.0123032	0.0320602		No Tx	0.363	11.1	0.0327027	0.0483268		No Tx	0.2	4.15	0.0481928	0.140219		0.178918	0.216077	0.187129
EGF	0.304	3.01	0.100997	1		EGF	1.37	3.57	0.383754	1		EGF	6.97	10.3	0.676699	1		EGF	1.99	5.79	0.343696	1		1	0	0
Afatinib + EGF	0.108	3.15	0.0342857	0.339474		Afatinib + EGF	0.0991	3.93	0.0252163	0.0657096		Afatinib + EGF	0.131	7.82	0.0167519	0.0247553		Afatinib + EGF	0.237	6.51	0.0364055	0.105924		0.133966	0.140956	0.122071
BMS + EGF	0.424	2.77	0.153069	1.51558		BMS + EGF	1.98	5.1	0.388235	1.01168		BMS + EGF	6.03	8.23	0.732685	1.08273		BMS + EGF	1.6	5.57	0.287253	0.835777		1.11144	0.288731	0.250048
MSP	0.0859	3.45	0.0248986	0.246528		MSP	0.0149	3.3	0.00451515	0.0117658		MSP	0.826	7.71	0.107134	0.158318		MSP	0.379	6.23	0.0608347	0.177001		0.148403	0.0986822	0.0854613
												Replicate1						Replicate2
													PY1068	EGFR	PY1068/EGFR				PY1068	EGFR	PY1068/EGFR	normalized		average	std dev (S)	Std dev (P)
												No Tx	52.1	14.7	3.54422	0.242152		No Tx	27.7	13.6	2.03676	0.2275		0.234826	0.0103605	0.00732599
												EGF	161	11	14.6364	1		EGF	94.9	10.6	8.95283	1		1	0	0
												Afatinib + EGF	8.53	11.7	0.72906	0.0498115		Afatinib + EGF	9.2	14.3	0.643357	0.0718607		0.0608361	0.0155911	0.0110246
												BMS + EGF	145	10.8	13.4259	0.917299		BMS + EGF	111	14.3	7.76224	0.867015		0.892157	0.0355564	0.0251422
												MSP	54.4	11.7	4.64957	0.317673		MSP	27.4	11.5	2.38261	0.266129		0.291901	0.0364468	0.0257718

## Sheet: Figure 5 - S1 - Statistics
Compared to no Treatments								Compared to 50 nM EGF
Parameter								Parameter
Table Analyzed	Data 2							Table Analyzed	Data 2
Two-way ANOVA								Two-way ANOVA
Source of Variation	% of total variation	P value						Source of Variation	% of total variation	P value
Interaction	1.72	0.4098						Interaction	1.72	0.4098
inhibitors	75.63	< 0.0001						inhibitors	75.63	< 0.0001
phosphorylation	0.04	0.7602						phosphorylation	0.04	0.7602
Source of Variation	P value summary	Significant?						Source of Variation	P value summary	Significant?
Interaction	ns	No						Interaction	ns	No
inhibitors	***	Yes						inhibitors	***	Yes
phosphorylation	ns	No						phosphorylation	ns	No
Source of Variation	Df	Sum-of-squares	Mean square	F				Source of Variation	Df	Sum-of-squares	Mean square	F
Interaction	4	0.1006	0.02514	1.043				Interaction	4	0.1006	0.02514	1.043
inhibitors	4	4.416	1.104	45.82				inhibitors	4	4.416	1.104	45.82
phosphorylation	1	0.002307	0.002307	0.09574				phosphorylation	1	0.002307	0.002307	0.09574
Residual	20	0.4819	0.0241					Residual	20	0.4819	0.0241
Number of missing values	10							Number of missing values	10
Bonferroni posttests								Bonferroni posttests
No Treatment vs 50 nM EGF								50 nM EGF vs No Treatment
phosphorylation	No Treatment	50 nM EGF	Difference	95% CI of diff.				phosphorylation	50 nM EGF	No Treatment	Difference	95% CI of diff.
PY1068/EGFR	0.1789	1	0.8211	0.4857 to 1.156				PY1068/EGFR	1	0.1789	-0.8211	-1.156 to -0.4857
PY/RON	0.2348	1	0.7652	0.2909 to 1.239				PY/RON	1	0.2348	-0.7652	-1.239 to -0.2909
phosphorylation	Difference	t	P value	Summary				phosphorylation	Difference	t	P value	Summary
PY1068/EGFR	0.8211	7.48	P<0.001	***				PY1068/EGFR	-0.8211	7.48	P<0.001	***
PY/RON	0.7652	4.929	P<0.001	***				PY/RON	-0.7652	4.929	P<0.001	***
No Treatment vs EGF + 10 uM Afatinib								50 nM EGF vs EGF + 10 uM Afatinib
phosphorylation	No Treatment	EGF + 10 uM Afatinib	Difference	95% CI of diff.				phosphorylation	50 nM EGF	EGF + 10 uM Afatinib	Difference	95% CI of diff.
PY1068/EGFR	0.1789	0.134	-0.04495	-0.3803 to 0.2904				PY1068/EGFR	1	0.134	-0.866	-1.201 to -0.5307
PY/RON	0.2348	0.06084	-0.174	-0.6482 to 0.3002				PY/RON	1	0.06084	-0.9392	-1.413 to -0.4649
phosphorylation	Difference	t	P value	Summary				phosphorylation	Difference	t	P value	Summary
PY1068/EGFR	-0.04495	0.4095	P > 0.05	ns				PY1068/EGFR	-0.866	7.89	P<0.001	***
PY/RON	-0.174	1.121	P > 0.05	ns				PY/RON	-0.9392	6.05	P<0.001	***
No Treatment vs EGF + 1 um BMS777607								50 nM EGF vs EGF + 1 um BMS777607
phosphorylation	No Treatment	EGF + 1 um BMS777607	Difference	95% CI of diff.				phosphorylation	50 nM EGF	EGF + 1 um BMS777607	Difference	95% CI of diff.
PY1068/EGFR	0.1789	1.111	0.9325	0.5972 to 1.268				PY1068/EGFR	1	1.111	0.1114	-0.2239 to 0.4468
PY/RON	0.2348	0.8922	0.6573	0.1831 to 1.132				PY/RON	1	0.8922	-0.1078	-0.5821 to 0.3664
phosphorylation	Difference	t	P value	Summary				phosphorylation	Difference	t	P value	Summary
PY1068/EGFR	0.9325	8.496	P<0.001	***				PY1068/EGFR	0.1114	1.015	P > 0.05	ns
PY/RON	0.6573	4.235	P<0.001	***				PY/RON	-0.1078	0.6947	P > 0.05	ns
No Treatment vs 5 nM MSP								50 nM EGF vs 5 nM MSP
phosphorylation	No Treatment	5 nM MSP	Difference	95% CI of diff.				phosphorylation	50 nM EGF	5 nM MSP	Difference	95% CI of diff.
PY1068/EGFR	0.1789	0.1484	-0.03051	-0.3658 to 0.3048				PY1068/EGFR	1	0.1484	-0.8516	-1.187 to -0.5163
PY/RON	0.2348	0.2919	0.05708	-0.4172 to 0.5313				PY/RON	1	0.2919	-0.7081	-1.182 to -0.2339
phosphorylation	Difference	t	P value	Summary				phosphorylation	Difference	t	P value	Summary
PY1068/EGFR	-0.03051	0.278	P > 0.05	ns				PY1068/EGFR	-0.8516	7.758	P<0.001	***
PY/RON	0.05708	0.3677	P > 0.05	ns				PY/RON	-0.7081	4.562	P<0.001	***
