# Supplementary material for: EGFR transactivates RON to drive oncogenic crosstalk
Source: eLife. 2021 Nov 25;10:e63678. doi: 10.7554/eLife.63678 (PMC8654365; doi:10.7554/eLife.63678)
Supplement: Figure 5—source data 2. [file elife-63678-fig5-data2.xlsx]

## Sheet: Figure 5A
	Figure 5A - Source data 1
	Replicate1							Replicate 2						Replicate3
		PY1068	EGFR	PY1068/EGFR	normalized				PY1068	EGFR	PY1068/EGFR	normalized			PY1068	EGFR	PY1068/EGFR	normalized			PY1068/EGFR	average	std dev(S)
	No Tx	29.4	12.2	2.40984	0.385116			No Tx	20.4	21.9	0.931507	0.219821		No Tx	77.8	16	4.8625	0.267276			No Tx	0.290738	0.0851085
	50 nM EGF	63.2	10.1	6.25743	1			50 nM EGF	76.7	18.1	4.23757	1		EGF	302	16.6	18.1928	1			50 nM EGF	1	0
	EGF + 10uM Afatinib	9.79	11.3	0.866372	0.138455			EGF + Afatinib	7.91	20.1	0.393532	0.0928675		EGF + 10 Afatinib	127	19.5	6.51282	0.357989			50 nM EGF + 10 uM Afatinib	0.196437	0.141753
	EGF + 5nM BMS777607	54	10.1	5.34653	0.85443			EGF + 1 uM BMS	94.2	17.2	5.47674	1.29243		EGF + 1 BMS	321	18.7	17.1658	0.943549			50 nM EGF + 1 uM BMS777607	1.03014	0.23148
	5 nM MSP	22.6	8.86	2.55079	0.407642			5 nM MSP	21.8	20.1	1.08458	0.255943		MSP	104	20.4	5.09804	0.280223			5 nM MSP	0.314603	0.0814837
	MSP + 10uM Afatinib	7.71	11	0.700909	0.112012			MSP + Afatinib	7.74	16.8	0.460714	0.108721		MSP + 10 Afatinib	48.5	19.1	2.53927	0.139576			5 nM MSP + 10 uM Afatinib	0.120103	0.0169438
	MSP + 5nM BMS777607	18.5	12.1	1.52893	0.244338			MSP + 1 uM BMS	29.2	17.6	1.65909	0.391519		MSP + 1 BMS	103	18.4	5.59783	0.307695			5 nM MSP + 1 uM BMS777607	0.314517	0.0738277

## Sheet: Figure 5B
	Figure 5B - Source data 1
	Replicate1							Replicate2						Replicate3
		PY20 + PY99	RON	PY/RON	normalized				PY20+PY99	RON	PY/RON	normalized			PY20+PY99	RON	PY/RON	normalized			PY/RON	average	std dev(S)
	No Tx	0.22	3.56	0.0617978	0.0336816			No Tx	0.128	4.11	0.0311436	0.0242077		No Tx	1.63	2.64	0.617424	0.167597			No Tx	0.0751621	0.080191
	50 nM EGF	8.55	4.66	1.83476	1			EGF	4.58	3.56	1.28652	1		EGF	8.51	2.31	3.68398	1			50 nM EGF	1	0
	EGF + 10uM Afatinib	0.519	5.47	0.0948812	0.051713			EGF + Afatinib	0.377	4.53	0.083223	0.0646886		EGF + 10 Afatinib	1.09	3.09	0.352751	0.0957526			50 nM EGF + 10 uM Afatinib	0.0707181	0.0226304
	EGF + 5nM BMS777607	1.48	4.98	0.297189	0.161977			EGF + 1uM BMS	2.05	4.17	0.491607	0.382122		EGF + 1 BMS	6.98	2.92	2.39041	0.648866			50 nM EGF + 1 uM BMS777607	0.397655	0.243816
	5 nM MSP	4.04	4.69	0.861407	0.469492			MSP	1.92	4.8	0.4	0.310917		MSP	6.75	3.13	2.15655	0.585385			5 nM MSP	0.455265	0.137786
	MSP + 10uM Afatinib	1.79	3.84	0.466146	0.254063			MSP + Afatinib	2.01	4.64	0.43319	0.336715		MSP + 10 Afatinib	3.6	2.58	1.39535	0.378761			5 nM MSP + 10 uM Afatinib	0.32318	0.0634413
	MSP + 5nM BMS777607	0.35	4.25	0.0823529	0.0448848			MSP + 1uM BMS	0.000443	3.75	0.000118133	9.18242e-05		MSP + 1 BMS	0.297	3.58	0.0829609	0.0225193			5 nM MSP + 1 uM BMS777607	0.0224986	0.0223965

## Sheet: Figure 5a 5b Statistics
Compared to no treatment								Compared to 50 nM EGF
Parameter								Parameter
Table Analyzed	Data 3							Table Analyzed	Data 3
Two-way ANOVA								Two-way ANOVA
Source of Variation	% of total variation	P value						Source of Variation	% of total variation	P value
Interaction	13.91	< 0.0001						Interaction	13.91	< 0.0001
inhibitors	75.65	< 0.0001						inhibitors	75.65	< 0.0001
phosphorylation	3.47	0.0009						phosphorylation	3.47	0.0009
Source of Variation	P value summary	Significant?						Source of Variation	P value summary	Significant?
Interaction	***	Yes						Interaction	***	Yes
inhibitors	***	Yes						inhibitors	***	Yes
phosphorylation	***	Yes						phosphorylation	***	Yes
Source of Variation	Df	Sum-of-squares	Mean square	F				Source of Variation	Df	Sum-of-squares	Mean square	F
Interaction	6	0.7307	0.1218	9.307				Interaction	6	0.7307	0.1218	9.307
inhibitors	6	3.973	0.6622	50.61				inhibitors	6	3.973	0.6622	50.61
phosphorylation	1	0.1822	0.1822	13.92				phosphorylation	1	0.1822	0.1822	13.92
Residual	28	0.3664	0.01309					Residual	28	0.3664	0.01309
Number of missing values	0							Number of missing values	0
Bonferroni posttests								Bonferroni posttests
No Treatment vs 50 nM EGF								50 nM EGF vs No Treatment
phosphorylation	No Treatment	50 nM EGF	Difference	95% CI of diff.				phosphorylation	50 nM EGF	No Treatment	Difference	95% CI of diff.
PY1068/EGFR	0.2907	1	0.7093	0.4179 to 1.001				PY1068/EGFR	1	0.2907	-0.7093	-1.001 to -0.4179
PY/RON	0.07516	1	0.9248	0.6334 to 1.216				PY/RON	1	0.07516	-0.9248	-1.216 to -0.6334
phosphorylation	Difference	t	P value	Summary				phosphorylation	Difference	t	P value	Summary
PY1068/EGFR	0.7093	7.594	P<0.001	***				PY1068/EGFR	-0.7093	7.594	P<0.001	***
PY/RON	0.9248	9.902	P<0.001	***				PY/RON	-0.9248	9.902	P<0.001	***
No Treatment vs EGF + 10 uM Afatinib								50 nM EGF vs EGF + 10 uM Afatinib
phosphorylation	No Treatment	EGF + 10 uM Afatinib	Difference	95% CI of diff.				phosphorylation	50 nM EGF	EGF + 10 uM Afatinib	Difference	95% CI of diff.
PY1068/EGFR	0.2907	0.1964	-0.0943	-0.3857 to 0.1971				PY1068/EGFR	1	0.1964	-0.8036	-1.095 to -0.5122
PY/RON	0.07516	0.07072	-0.004444	-0.2958 to 0.2870				PY/RON	1	0.07072	-0.9293	-1.221 to -0.6379
phosphorylation	Difference	t	P value	Summary				phosphorylation	Difference	t	P value	Summary
PY1068/EGFR	-0.0943	1.01	P > 0.05	ns				PY1068/EGFR	-0.8036	8.603	P<0.001	***
PY/RON	-0.004444	0.04758	P > 0.05	ns				PY/RON	-0.9293	9.949	P<0.001	***
No Treatment vs EGF + 1 um BMS777607								50 nM EGF vs EGF + 1 um BMS777607
phosphorylation	No Treatment	EGF + 1 um BMS777607	Difference	95% CI of diff.				phosphorylation	50 nM EGF	EGF + 1 um BMS777607	Difference	95% CI of diff.
PY1068/EGFR	0.2907	1.03	0.7394	0.4480 to 1.031				PY1068/EGFR	1	1.03	0.03014	-0.2613 to 0.3215
PY/RON	0.07516	0.3977	0.3225	0.03109 to 0.6139				PY/RON	1	0.3977	-0.6023	-0.8937 to -0.3109
phosphorylation	Difference	t	P value	Summary				phosphorylation	Difference	t	P value	Summary
PY1068/EGFR	0.7394	7.916	P<0.001	***				PY1068/EGFR	0.03014	0.3226	P > 0.05	ns
PY/RON	0.3225	3.453	P<0.01	**				PY/RON	-0.6023	6.449	P<0.001	***
No Treatment vs 5 nM MSP								50 nM EGF vs 5 nM MSP
phosphorylation	No Treatment	5 nM MSP	Difference	95% CI of diff.				phosphorylation	50 nM EGF	5 nM MSP	Difference	95% CI of diff.
PY1068/EGFR	0.2907	0.3146	0.02386	-0.2675 to 0.3153				PY1068/EGFR	1	0.3146	-0.6854	-0.9768 to -0.3940
PY/RON	0.07516	0.4553	0.3801	0.08870 to 0.6715				PY/RON	1	0.4553	-0.5447	-0.8361 to -0.2533
phosphorylation	Difference	t	P value	Summary				phosphorylation	Difference	t	P value	Summary
PY1068/EGFR	0.02386	0.2555	P > 0.05	ns				PY1068/EGFR	-0.6854	7.338	P<0.001	***
PY/RON	0.3801	4.07	P<0.001	***				PY/RON	-0.5447	5.832	P<0.001	***
No Treatment vs MSP + 10 uM Afatinib								50 nM EGF vs MSP + 10 uM Afatinib
phosphorylation	No Treatment	MSP + 10 uM Afatinib	Difference	95% CI of diff.				phosphorylation	50 nM EGF	MSP + 10 uM Afatinib	Difference	95% CI of diff.
PY1068/EGFR	0.2907	0.1201	-0.1706	-0.4620 to 0.1208				PY1068/EGFR	1	0.1201	-0.8799	-1.171 to -0.5885
PY/RON	0.07516	0.3232	0.248	-0.04338 to 0.5394				PY/RON	1	0.3232	-0.6768	-0.9682 to -0.3854
phosphorylation	Difference	t	P value	Summary				phosphorylation	Difference	t	P value	Summary
PY1068/EGFR	-0.1706	1.827	P > 0.05	ns				PY1068/EGFR	-0.8799	9.421	P<0.001	***
PY/RON	0.248	2.655	P < 0.05	*				PY/RON	-0.6768	7.246	P<0.001	***
No Treatment vs MSP + 1 uM BMS777607								50 nM EGF vs MSP + 1 uM BMS777607
phosphorylation	No Treatment	MSP + 1 uM BMS777607	Difference	95% CI of diff.				phosphorylation	50 nM EGF	MSP + 1 uM BMS777607	Difference	95% CI of diff.
PY1068/EGFR	0.2907	0.3145	0.02378	-0.2676 to 0.3152				PY1068/EGFR	1	0.3145	-0.6855	-0.9769 to -0.3941
PY/RON	0.07516	0.0225	-0.05266	-0.3441 to 0.2387				PY/RON	1	0.0225	-0.9775	-1.269 to -0.6861
phosphorylation	Difference	t	P value	Summary				phosphorylation	Difference	t	P value	Summary
PY1068/EGFR	0.02378	0.2546	P > 0.05	ns				PY1068/EGFR	-0.6855	7.339	P<0.001	***
PY/RON	-0.05266	0.5638	P > 0.05	ns				PY/RON	-0.9775	10.47	P<0.001	***
