# Supplementary material for: EGFR transactivates RON to drive oncogenic crosstalk
Source: eLife. 2021 Nov 25;10:e63678. doi: 10.7554/eLife.63678 (PMC8654365; doi:10.7554/eLife.63678)
Supplement: Figure 6—source data 2. [file elife-63678-fig6-data2.xlsx]

## Sheet: Figure 6A
Figure 6A -Source Data
Replicate1						Replicate2						Replicate3
	PY1068	EGFR	PY1068/EGFR	normalized			PY1068	EGFR	PY1068/EGFR	normalized			PY1068	EGFR	PY1068/EGFR	normalized		average	std dev(S)
No Tx	18.1	7.71	2.3476	0.353729		No PreTx - No Tx	7.05	4.26	1.65493	0.300433		No Pre-Tx - No Tx	13.5	4.2	3.21429	0.389404		0.347856	0.0447754
10 nM Dasatinib - No Tx	18.3	6.6	2.77273	0.417786		10 nM Dasatinib	6.3	3.72	1.69355	0.307444		10nM Dasatinib - No Tx	14.5	4.29	3.37995	0.409475		0.378235	0.0614474
50 nM EGF	51.7	7.79	6.63671	1		No PreTx - EGF Tx	19.5	3.54	5.50847	1		No Pre-Tx - EGF Tx	33.1	4.01	8.25436	1		1	0
10 nM Dasatinib - EGF Tx	50.6	7.39	6.84709	1.0317		10 nM Dasatinib - EGF Tx	26.6	4.06	6.55172	1.18939		10nM Dasatinib - EGF Tx	34.8	3.85	9.03896	1.09505		1.10538	0.0793512
Replicate1						Replicate2						Replicate3
	PY20+PY99	RON	PY/RON	normalized			PY20+PY99	RON	PY/RON	normalized			PY20+PY99	RON	PY/RON	normalized		average	std dev(S)
No Tx	0.511	0.768	0.665365	0.456372		No PreTx - No Tx	0.084	0.497	0.169014	0.0584201		No Pre-Tx - No Tx	0.765	0.538	1.42193	0.249545		0.254779	0.199028
10 nM Dasatinib - No Tx	0.284	0.98	0.289796	0.19877		10 uM Dasatinib	0.229	0.689	0.332366	0.114883		10nM Dasatinib - No Tx	0.623	0.47	1.32553	0.232626		0.182093	0.0606175
50 nM EGF	1.56	1.07	1.45794	1		No PreTx - EGF Tx	1.38	0.477	2.89308	1		No Pre-Tx - EGF Tx	3.02	0.53	5.69811	1		1	0
10 nM Dasatinib - EGF Tx	1.43	0.782	1.82864	1.25426		10 uM Dasatinib - EGF Tx	1.2	0.327	3.66972	1.26845		10nM Dasatinib - EGF Tx	3.17	0.463	6.84665	1.20156		1.24143	0.0352413

## Sheet: Figure 6A Statistics
Compared to No Treatment							Compared to EGF
Table Analyzed	Copy of Replicates						Table Analyzed	Copy of Replicates
Two-way ANOVA							Two-way ANOVA
Source of Variation	% of total variation	P value					Source of Variation	% of total variation	P value
Interaction	2.18	0.0223					Interaction	2.18	0.0223
Column Factor	94.84	< 0.0001					Column Factor	94.84	< 0.0001
Row Factor	0.21	0.2813					Row Factor	0.21	0.2813
Source of Variation	P value summary	Significant?					Source of Variation	P value summary	Significant?
Interaction	*	Yes					Interaction	*	Yes
Column Factor	***	Yes					Column Factor	***	Yes
Row Factor	ns	No					Row Factor	ns	No
Source of Variation	Df	Sum-of-squares	Mean square	F			Source of Variation	Df	Sum-of-squares	Mean square	F
Interaction	3	0.08967	0.02989	4.224			Interaction	3	0.08967	0.02989	4.224
Column Factor	3	3.893	1.298	183.4			Column Factor	3	3.893	1.298	183.4
Row Factor	1	0.008798	0.008798	1.243			Row Factor	1	0.008798	0.008798	1.243
Residual	16	0.1132	0.007076				Residual	16	0.1132	0.007076
Number of missing values	0						Number of missing values	0
Bonferroni posttests							Bonferroni posttests
No Tx vs 10 nM Dasatinib							50 nM EGF vs No Tx
Row Factor	No Tx	10 nM Dasatinib	Difference	95% CI of diff.			Row Factor	50 nM EGF	No Tx	Difference	95% CI of diff.
PY1068/EGFR	0.3479	0.3782	0.03038	-0.1762 to 0.2370			PY1068/EGFR	1	0.3479	-0.6521	-0.8588 to -0.4455
PY/RON	0.2548	0.1821	-0.07269	-0.2793 to 0.1339			PY/RON	1	0.2548	-0.7452	-0.9518 to -0.5386
Row Factor	Difference	t	P value	Summary			Row Factor	Difference	t	P value	Summary
PY1068/EGFR	0.03038	0.4423	P > 0.05	ns			PY1068/EGFR	-0.6521	9.495	P<0.001	***
PY/RON	-0.07269	1.058	P > 0.05	ns			PY/RON	-0.7452	10.85	P<0.001	***
No Tx vs 50 nM EGF							50 nM EGF vs 10 nM Dasatinib
Row Factor	No Tx	50 nM EGF	Difference	95% CI of diff.			Row Factor	50 nM EGF	10 nM Dasatinib	Difference	95% CI of diff.
PY1068/EGFR	0.3479	1	0.6521	0.4455 to 0.8588			PY1068/EGFR	1	0.3782	-0.6218	-0.8284 to -0.4151
PY/RON	0.2548	1	0.7452	0.5386 to 0.9518			PY/RON	1	0.1821	-0.8179	-1.025 to -0.6113
Row Factor	Difference	t	P value	Summary			Row Factor	Difference	t	P value	Summary
PY1068/EGFR	0.6521	9.495	P<0.001	***			PY1068/EGFR	-0.6218	9.053	P<0.001	***
PY/RON	0.7452	10.85	P<0.001	***			PY/RON	-0.8179	11.91	P<0.001	***
No Tx vs EGF + 10 nM Dasatinib							50 nM EGF vs EGF + 10 nM Dasatinib
Row Factor	No Tx	EGF + 10 nM Dasatinib	Difference	95% CI of diff.			Row Factor	50 nM EGF	EGF + 10 nM Dasatinib	Difference	95% CI of diff.
PY1068/EGFR	0.3479	1.105	0.7575	0.5509 to 0.9641			PY1068/EGFR	1	1.105	0.1054	-0.1012 to 0.3120
PY/RON	0.2548	1.241	0.9866	0.7800 to 1.193			PY/RON	1	1.241	0.2414	0.03481 to 0.4480
Row Factor	Difference	t	P value	Summary			Row Factor	Difference	t	P value	Summary
PY1068/EGFR	0.7575	11.03	P<0.001	***			PY1068/EGFR	0.1054	1.534	P > 0.05	ns
PY/RON	0.9866	14.37	P<0.001	***			PY/RON	0.2414	3.515	P<0.01	**

## Sheet: Figure 6B
Figure 6B - Source data
Replicate 1						Replicate2						Replicate3
	PY20+PY99	RON	PY/RON	normalized			PY20+PY99	RON	PY/RON	normalized			PY20+PY99	RON	PY/RON	normalized			average	std dev (S)
delta - No Tx	0.183	0.218	0.83945	0.644116		Delta - No Tx	1.08	1.54	0.701299	0.661387		delta - No Tx	0.545	0.598	0.911371	0.559999		Delta - No Tx	0.621834	0.0542425
delta - EGF	1.43	0.218	6.55963	5.03326		Delta - EGF Tx	3.59	1.34	2.6791	2.52664		delta - EGF	3.46	0.936	3.69658	2.27139		Delta - EGF	3.2771	1.52623
WT - No Tx	0.102	0.485	0.210309	0.161372		WT - No Tx	0.969	1.52	0.6375	0.60122		WT - No Tx	0.365	0.692	0.527457	0.3241		WT - No Tx	0.319943	0.17213
WT - EGF	0.52	0.399	1.30326	1		WT - EGF Tx	1.23	1.16	1.06034	1		WT - EGF	1.66	1.02	1.62745	1		WT - EGF	1	0
Replicate1						Replicate2						Replicate3						Replicate4						Replicate5						Replicate6						Replicate7						Replicate8						Replicate9
												REPEAT samples 7/30 and 7/31						REPEAT samples 7/30 and 7/31
	PY20 + PY99	RON	PY/RON	normalized			PY20+PY99	RON	PY/RON	normalized			PY20+PY99	RON	PY/RON	normalized			PY20+PY99	RON	PY/RON	normalized			PY20+PY99	RON	PY/RON	normalized			PY20+PY99	RON	PY/RON	normalized			PY20+PY99	RON	PY/RON	normalized			PY20+PY99	RON	PY/RON	normalized			PY20+PY99
WT - No Tx	0.149	1.05	0.141905	0.353599		WT - No Tx	0.229	1.42	0.161268			WT - No Tx	0.126	0.839	0.150179	0.380908		WT - No Tx	0.0925	0.134	0.690299			WT - No Tx	0.081	0.134	0.604478	0.429594		WT - No Tx	0.102	0.485	0.210309	0.161372		WT - No Tx	0.969	1.52	0.6375	0.60122		WT - No Tx	0.365	0.692	0.527457	0.3241		WT - No Tx	0.519
WT - EGF Tx	0.305	0.76	0.401316	1		WT - EGF Tx	0.303	1.06	0.285849			WT - EGF Tx	0.33	0.837	0.394265	1		WT - EGF Tx	0.402	0.145	2.77241			WT - EGF Tx	0.131	0.0931	1.40709	1		WT - EGF	0.52	0.399	1.30326	1		WT - EGF Tx	1.23	1.16	1.06034	1		WT - EGF	1.66	1.02	1.62745	1		WT - 50 nM EGF	2.35
[truncated: 18 more columns]

## Sheet: Figure 6B Statistics
Table Analyzed	PY/RON-delta
Two-way ANOVA
Source of Variation	% of total variation	P value
Interaction	14.69	0.0534
ligand	39.15	0.0061
mutant	23.23	0.0216
Source of Variation	P value summary	Significant?
Interaction	ns	No
ligand	**	Yes
mutant	*	Yes
Source of Variation	Df	Sum-of-squares	Mean square	F
Interaction	1	3.053	3.053	5.127
ligand	1	8.133	8.133	13.66
mutant	1	4.826	4.826	8.105
Residual	8	4.764	0.5954
Number of missing values	0
Bonferroni posttests
No treatment vs 50 nM EGF
mutant	No treatment	50 nM EGF	Difference	95% CI of diff.
EGFR-WT	0.3622	1	0.6378	-1.096 to 2.371
EGF-D9	0.6218	3.277	2.655	0.9217 to 4.389
mutant	Difference	t	P value	Summary
EGFR-WT	0.6378	1.012	P > 0.05	ns
EGFR-D998	2.655	4.214	P<0.01	**

## Sheet: Figure 6C
Figure 6C - Source Data
Replicate1								Replicate2									Replicate3
																												normalized			PY normalized
	PY20+PY99	RON	PY/RON	PY/RON	normalized	PY normalized			PY20+PY99	RON	PY/RON	PY/RON	normalized	PY normalized	For Blot			PY20+PY99	RON	PY/RON	PY/RON	normalized	PY normalized		averages	std dev		averages	std dev		averages	std dev
RON K1114M - No ATP	70659	11.6	6091.29	6.09129	1.45827	0.156435		RON K1114M - No ATP	57344	9.9	5792.32	5.79232	0.921181	0.138052	1		RON K1114M - No ATP	62370	9.6	6496.88	6.49688	0.434433	0.074353		6.12683	0.353618		0.937962	0.512127		0.122947	0.0430754
RON K1114M - +ATP	93393	10.1	9246.83	9.24683	2.21372	0.206767		RON K1114M - +ATP	102144	10.3	9916.89	9.91689	1.57713	0.245905	1.78125		RON K1114M - +ATP	158598	8.55	18549.5	18.5495	1.24036	0.189069		12.5711	5.18828		1.67707	0.494313		0.213914	0.0290841
EGFR high+RON - No ATP	56808	13.6	4177.06	4.17706	1	0.12577		EGFR high+RON - No ATP	72940	11.6	6287.93	6.28793	1	0.175598	1.27197		EGFR high+RON - No ATP	154035	10.3	14954.9	14.9549	1	0.183629		8.47328	5.71157		1	0		0.161666	0.0313453
EGFR high+RON - +ATP	451683	11.7	38605.4	38.6054	9.24224	1		EGFR high+RON - +ATP	415380	10.7	38820.6	38.8206	6.17382	1	7.24365		EGFR high+RON - +ATP	838836	8.71	96307.2	96.3072	6.43986	1		57.9111	33.2522		7.28531	1.69997		1	0
EGFR low+RON - No ATP	57591	11.3	5096.55	5.09655	1.22013	0.127503		EGFR low+RON - No ATP	48076	11.2	4292.5	4.2925	0.682657	0.11574	0.838379		EGFR low+RON - No ATP	96552	10.9	8857.98	8.85798	0.592315	0.115102		6.08234	2.43716		0.8317	0.339408		0.119448	0.00698286
EGFR low+RON - +ATP	341091	12.8	26647.7	26.6477	6.37954	0.755156		EGFR low+RON - +ATP	375060	10.5	35720	35.72	5.68072	0.902932	6.54053		EGFR low+RON - +ATP	220833	8.81	25066.2	25.0662	1.67612	0.263261		29.1446	5.74908		4.5788	2.53796		0.64045	0.334907

## Sheet: Figure 6C Statistics
Statistical analysis
Table Analyzed	Data 2							Table Analyzed	Data 2
One-way analysis of variance								One-way analysis of variance
P value	0.0044							P value	0.0044
P value summary	**							P value summary	**
Are means signif. different? (P < 0.05)	Yes							Are means signif. different? (P < 0.05)	Yes
Number of groups	6							Number of groups	6
F	6.262							F	6.262
R square	0.7229							R square	0.7229
ANOVA Table	SS	df	MS					ANOVA Table	SS	df	MS
Treatment (between columns)	6285	5	1257					Treatment (between columns)	6285	5	1257
Residual (within columns)	2409	12	200.7					Residual (within columns)	2409	12	200.7
Total	8694	17						Total	8694	17
Bonferroni's Multiple Comparison Test	Mean Diff.	t	Significant? P < 0.05?	Summary	95% CI of diff			Tukey's Multiple Comparison Test	Mean Diff.	q	Significant? P < 0.05?	Summary	95% CI of diff
RON K1114M - No ATP vs RON K1114M - +ATP	-6.444	0.5571	No	ns	-48.65 to 35.77			RON K1114M - No ATP vs RON K1114M - +ATP	-6.444	0.7878	No	ns	-45.31 to 32.42
RON K1114M - No ATP vs EGFR high + RON - No ATP	-2.346	0.2028	No	ns	-44.56 to 39.86			RON K1114M - No ATP vs EGFR high + RON - No ATP	-2.346	0.2869	No	ns	-41.21 to 36.52
RON K1114M - No ATP vs EGFR high + RON - +ATP	-51.78	4.477	Yes	*	-93.99 to -9.574			RON K1114M - No ATP vs EGFR high + RON - +ATP	-51.78	6.331	Yes	**	-90.65 to -12.92
RON K1114M - No ATP vs EGFR low + RON - No ATP	0.04449	0.003846	No	ns	-42.17 to 42.25			RON K1114M - No ATP vs EGFR low + RON - No ATP	0.04449	0.005438	No	ns	-38.82 to 38.91
RON K1114M - No ATP vs EGFR low + RON - +ATP	-23.02	1.99	No	ns	-65.23 to 19.19			RON K1114M - No ATP vs EGFR low + RON - +ATP	-23.02	2.814	No	ns	-61.88 to 15.84
RON K1114M - +ATP vs EGFR high + RON - No ATP	4.098	0.3542	No	ns	-38.11 to 46.31			RON K1114M - +ATP vs EGFR high + RON - No ATP	4.098	0.501	No	ns	-34.76 to 42.96
RON K1114M - +ATP vs EGFR high + RON - +ATP	-45.34	3.919	Yes	*	-87.55 to -3.130			RON K1114M - +ATP vs EGFR high + RON - +ATP	-45.34	5.543	Yes	*	-84.20 to -6.478
RON K1114M - +ATP vs EGFR low + RON - No ATP	6.489	0.5609	No	ns	-35.72 to 48.70			RON K1114M - +ATP vs EGFR low + RON - No ATP	6.489	0.7933	No	ns	-32.37 to 45.35
RON K1114M - +ATP vs EGFR low + RON - +ATP	-16.57	1.433	No	ns	-58.78 to 25.64			RON K1114M - +ATP vs EGFR low + RON - +ATP	-16.57	2.026	No	ns	-55.44 to 22.29
EGFR high + RON - No ATP vs EGFR high + RON - +ATP	-49.44	4.274	Yes	*	-91.65 to -7.227			EGFR high + RON - No ATP vs EGFR high + RON - +ATP	-49.44	6.044	Yes	*	-88.30 to -10.58
EGFR high + RON - No ATP vs EGFR low + RON - No ATP	2.391	0.2067	No	ns	-39.82 to 44.60			EGFR high + RON - No ATP vs EGFR low + RON - No ATP	2.391	0.2923	No	ns	-36.47 to 41.25
EGFR high + RON - No ATP vs EGFR low + RON - +ATP	-20.67	1.787	No	ns	-62.88 to 21.54			EGFR high + RON - No ATP vs EGFR low + RON - +ATP	-20.67	2.527	No	ns	-59.53 to 18.19
EGFR high + RON - +ATP vs EGFR low + RON - No ATP	51.83	4.48	Yes	*	9.618 to 94.04			EGFR high + RON - +ATP vs EGFR low + RON - No ATP	51.83	6.336	Yes	**	12.97 to 90.69
EGFR high + RON - +ATP vs EGFR low + RON - +ATP	28.77	2.487	No	ns	-13.44 to 70.98			EGFR high + RON - +ATP vs EGFR low + RON - +ATP	28.77	3.517	No	ns	-10.10 to 67.63
EGFR low + RON - No ATP vs EGFR low + RON - +ATP	-23.06	1.994	No	ns	-65.27 to 19.15			EGFR low + RON - No ATP vs EGFR low + RON - +ATP	-23.06	2.819	No	ns	-61.92 to 15.80
