# Supplementary material for: EGFR transactivates RON to drive oncogenic crosstalk
Source: eLife. 2021 Nov 25;10:e63678. doi: 10.7554/eLife.63678 (PMC8654365; doi:10.7554/eLife.63678)
Supplement: Figure 7—source data 2. [file elife-63678-fig7-data2.xlsx]

## Sheet: Figure 7A
Figure 7A - Source Data
Replicate1						Replicate2						Replicate3						Replicate4						Replicate5						Replicate6						Replicate7						Replicate8						Replicate9
	PY1068	EGFR	PY1068/EGFR	normalized			PY1068	EGFR	PY1068/EGFR	normalized			PY1068	EGFR	PY1068/EGFR	normalized			PY1068	EGFR	PY1068/EGFR	normalized			PY1068	EGFR	PY1068/EGFR	normalized			PY1068	EGFR	PY1068/EGFR	normalized			PY1068	EGFR	PY1068/EGFR	normalized			PY1068	EGFR	PY1068/EGFR	normalized			PY1068
WT - No Tx	6.27	6.7	0.935821	0.177502		WT - No Tx	5.52	16.7	0.330539	0.0839806		WT - No Tx	2.02	1.97	1.02538	0.135818		WT - No Tx	3.61	4.78	0.75523	0.134234		EGFR WT - No Tx	8	3.68	2.17391	0.251009		EGFR WT - No Tx	0.68	1.97	0.345178	0.0585569		WT - No Tx	0.949	2.89	0.328374	0.0883624		WT - No Tx	0.296	2.56	0.115625	0.0525568		WT - No Tx	1.04
WT - 50 nM EGF	33.9	6.43	5.27216	1		WT - 50 nM EGF	61.4	15.6	3.9359	1		WT - EGF Tx	11.4	1.51	7.54967	1		WT - 50 nM EGF	29.2	5.19	5.6262	1		EGFR WT - EGF Tx	29.1	3.36	8.66071	1		EGFR WT - EGF Tx	11.2	1.9	5.89474	1		WT - EGF	11	2.96	3.71622	1		WT - EGF Tx	4.62	2.1	2.2	1		WT - EGF Tx	6.84
																		I682Q - No Tx	1.33	5.09	0.261297	0.0464428		EGFR I682Q - No Tx	0.559	3.01	0.185714	0.0214433		EGFR I682Q - No Tx	0.138	2.18	0.0633028	0.0107389		I682Q - No Tx	0.136	2.67	0.0509363	0.0137065								I682Q - No Tx	0.135
																		I682Q - 50 nM EGF	6.59	3.96	1.66414	0.295784		WGFR I682Q - EGF Tx	5.2	2.6	2	0.230928		WGFR I682Q - EGF Tx	2.73	2.14	1.2757	0.216414		I682Q - EGF	2.05	2.71	0.756458	0.203556								I682Q - EGF Tx	1.45
V924R - No Tx	1.13	6.58	0.171733	0.0325735		V924R - No Tx	0.969	14.5	0.0668276	0.016979								V924R - No Tx	0.74	3.62	0.20442	0.0363335		EGFR V924R - No Tx	0.293	2.66	0.11015	0.0127184		EGFR V924R - No Tx	0.0814	2.23	0.0365022	0.00619234		V924R - No Tx	0.106	2.55	0.0415686	0.0111857								V924R - No Tx	0.109
V924R - 50 nM EGF	6.8	6.28	1.0828	0.205381		V924R - 50 nM EGF	5.49	15	0.366	0.0929902								V924R - 50 nM EGF	2.43	3.14	0.773885	0.13755		EGFR V924R - EGF Tx	2.37	2.71	0.874539	0.100978		EGFR V924R - EGF Tx	1.49	1.96	0.760204	0.128963		V924R - EGF	1.14	2.74	0.416058	0.111958								V924R - EGF Tx	0.668
																														EGFR I682Q+V924R - No Tx	0.929	3.09	0.300647	0.0510027								I682Q+V924R - No Tx	0.698	3.27	0.213456	0.0970253		IQ+VR - No Tx	0.577
																														EGFR I682Q+V924R - EGF Tx	9.89	2.85	3.47018	0.58869								I682Q+V924R - EGF Tx	5.74	3.03	1.89439	0.861086		IQ+VR - EGF Tx	3.64
[truncated: 26 more columns]

## Sheet: Figure7B
Figure 7B - Source Data
Replicate1						Replicate2						Replicate3						Replicate4																								Replicate5						Replicate6
	PY20+PY99	RON	PY/RON	normalized			PY20+PY99	RON	PY/RON	normalized			PY20+PY99	RON	PY/RON	normalized			PY20+PY99	RON	PY/RON	normalized																					PY20 + PY99	RON	PY/RON	normalized			PY20+PY99
WT - No Tx	0.519	3.07	0.169055	0.176249		WT - No Tx	0.602	1.05	0.573333	0.512061		WT - No Tx	0.0341	0.443	0.0769752	0.0409538		WT - No Tx	0.488	0.739	0.660352	0.219376																				WT - No Tx	0.149	1.05	0.141905	0.353599		WT - No Tx	0.229
WT - 50 nM EGF	2.35	2.45	0.959184	1		WT - 50 nM EGF	1.31	1.17	1.11966	1		WT - EGF Tx	1.03	0.548	1.87956	1		WT - 50 nM EGF	2.08	0.691	3.01013	1																				WT - EGF Tx	0.305	0.76	0.401316	1		WT - EGF Tx	0.303
																		I682Q - No Tx	0.545	0.96	0.567708	0.188599																										I682Q - No Tx	0.112
																		I682Q - 50 nM EGF	0.313	0.553	0.566004	0.188033																										I682Q - EGF Tx	0.0552
V924R - No Tx	0.475	3.16	0.150316	0.156713		V924R - No Tx	0.421	0.806	0.522333	0.466511								V924R - No Tx	0.315	0.752	0.418883	0.139158																										V924R - No Tx	0.0389
V924R - 50 nM EGF	0.53	3.35	0.158209	0.164941		V924R - 50 nM EGF	0.444	0.796	0.557789	0.498178								V924R - 50 nM EGF	0.488	0.744	0.655914	0.217902																										V924R - EGF Tx	0.0466
																																										I682Q+V924R - No Tx	0.129	0.931	0.138561	0.345266		IQ+VR - No Tx	0.0294
																																										I682Q+V924R - EGF Tx	0.225	0.692	0.325145	0.810196		IQ+VR - EGF Tx	0.0098
[truncated: 34 more columns]

## Sheet: Figure 7A 7B Statistics
Table Analyzed	PY/RON-IQ+VR							Table Analyzed	PY1068/EGFR-IQ+VR
Two-way ANOVA								Two-way ANOVA
Source of Variation	% of total variation	P value						Source of Variation	% of total variation	P value
Interaction	22.57	< 0.0001						Interaction	21.11	< 0.0001
Treatment	17.37	< 0.0001						treatment	31.33	< 0.0001
mutants	40.1	< 0.0001						mutants	37.34	< 0.0001
Source of Variation	P value summary	Significant?						Source of Variation	P value summary	Significant?
Interaction	***	Yes						Interaction	***	Yes
Treatment	***	Yes						treatment	***	Yes
mutants	***	Yes						mutants	***	Yes
Source of Variation	Df	Sum-of-squares	Mean square	F				Source of Variation	Df	Sum-of-squares	Mean square	F
Interaction	3	1.122	0.3739	21.93				Interaction	3	1.708	0.5693	169.8
Treatment	1	0.8634	0.8634	50.64				treatment	1	2.534	2.534	755.9
mutants	3	1.993	0.6644	38.97				mutants	3	3.021	1.007	300.4
Residual	34	0.5797	0.01705					Residual	56	0.1877	0.003353
Number of missing values	22							Number of missing values	24
Bonferroni posttests								Bonferroni posttests
No treatment vs 50 nM EGF								No treatment vs 50 nM EGF
mutants	No treatment	50 nM EGF	Difference	95% CI of diff.				mutants	No treatment	50 nM EGF	Difference	95% CI of diff.
EGFR-WT	0.2843	1	0.7157	0.5435 to 0.8879				EGFR-WT	0.1415	1	0.8585	0.7948 to 0.9222
EGFR-I682Q	0.1512	0.1725	0.02134	-0.2222 to 0.2649				EGFR-I682Q	0.02728	0.2118	0.1845	0.1046 to 0.2644
EGFR-V924R	0.1725	0.1835	0.01099	-0.1878 to 0.2098				EGFR-V924R	0.02285	0.1284	0.1056	0.03514 to 0.1760
EGFR-I682Q+V924R	0.2081	0.6892	0.4811	0.1999 to 0.7623				EGFR-I682Q+V924R	0.1115	0.6248	0.5133	0.4187 to 0.6078
mutants	Difference	t	P value	Summary				mutants	Difference	t	P value	Summary
EGFR-WT	0.7157	10.96	P<0.001	***				EGFR-WT	0.8585	34.77	P<0.001	***
EGFR-I682Q	0.02134	0.2311	P > 0.05	ns				EGFR-I682Q	0.1845	5.962	P<0.001	***
EGFR-V924R	0.01099	0.1458	P > 0.05	ns				EGFR-V924R	0.1056	3.868	P<0.01	**
EGFR-I682Q+V924R	0.4811	4.513	P<0.001	***				EGFR-I682Q+V924R	0.5133	14.02	P<0.001	***
