# Supplementary figures and images for: EGFR transactivates RON to drive oncogenic crosstalk
Source: eLife journal article supplement (doi:10.7554/elife.63678), 2021-11-25

Figure 1 - Figure Supplement 1 - Source Data 1

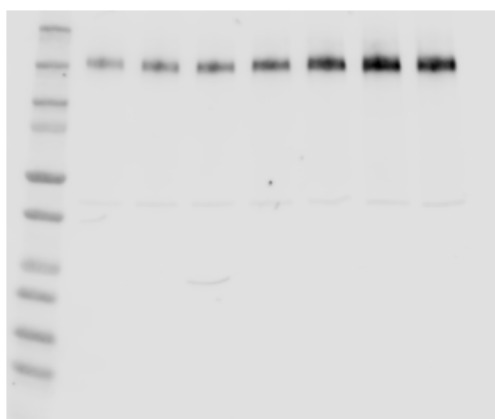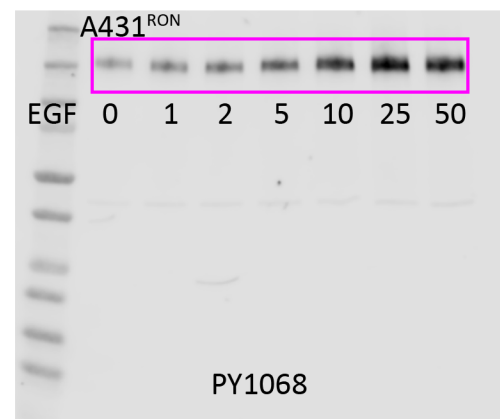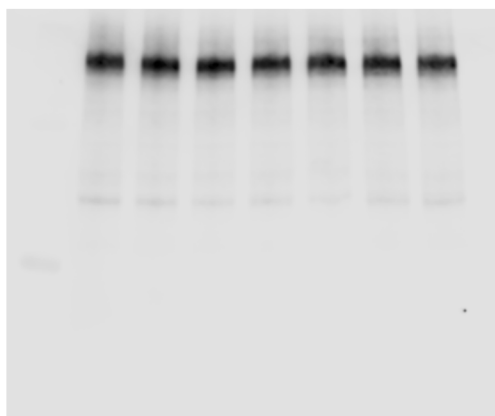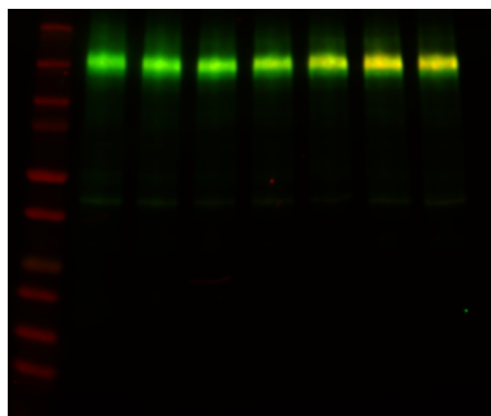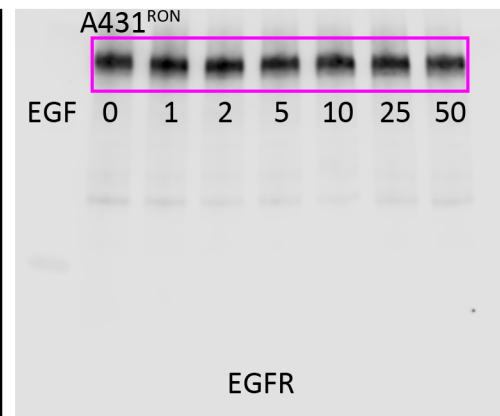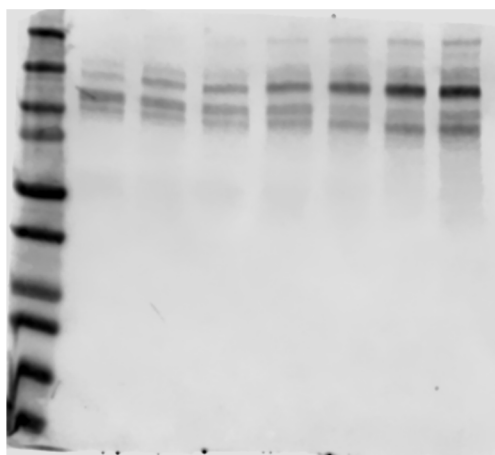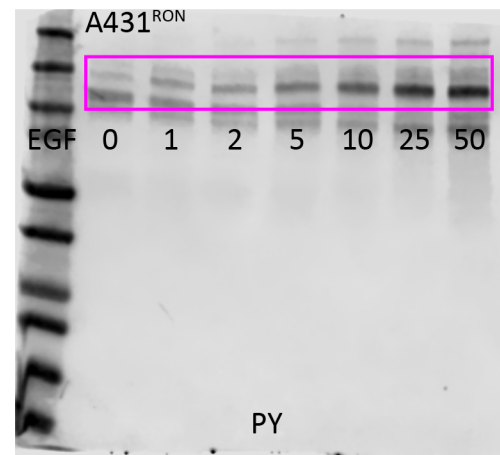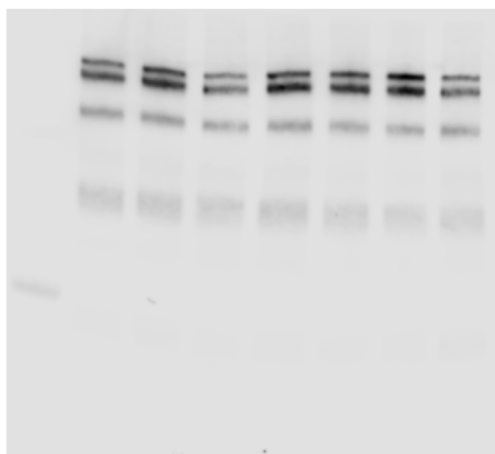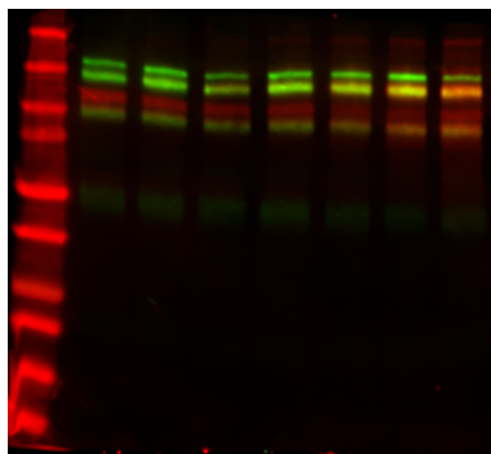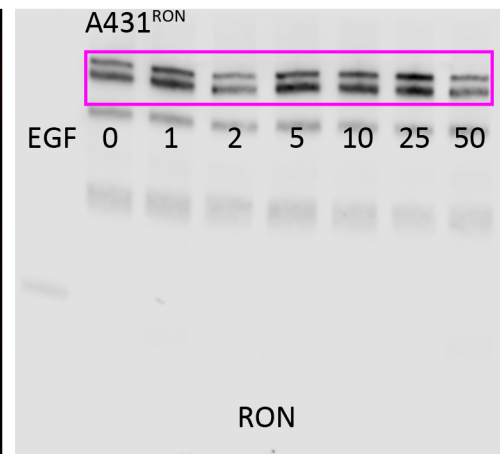

Supplement: fig1-figsupp1-data1 [file elife-63678-fig1-figsupp1-data1-v2.zip]

Figure 1 - Figure Supplement 2 - Source Data 1

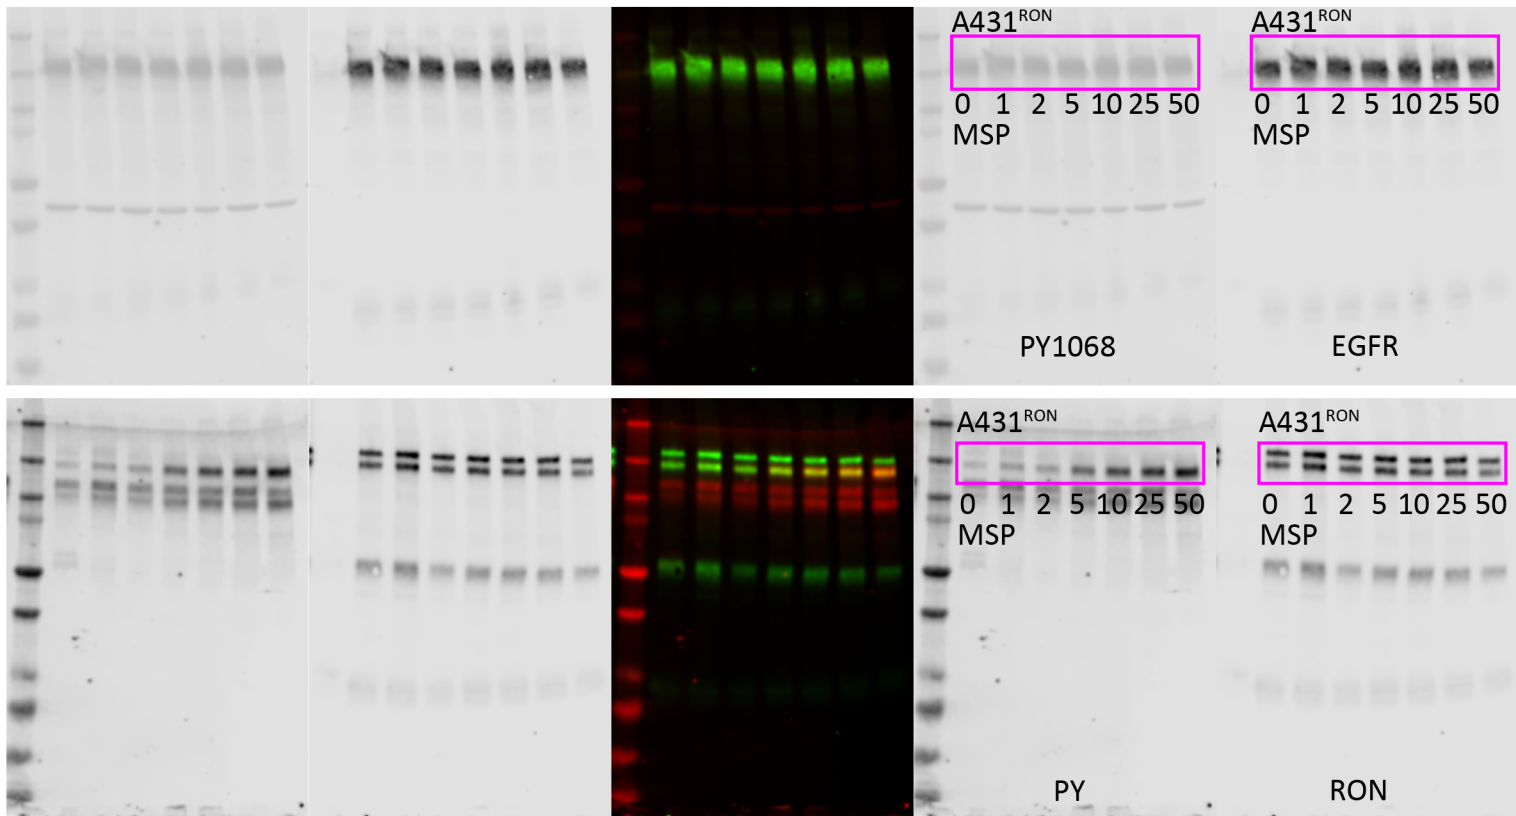

Supplement: fig1-figsupp2-data1 [file Figure 1 - Figure Supplement 2 - Source Data 1 - Annotated.pdf › Figure 1 - Figure Supplement 2 - Source Data 1/Figure 1 - Figure Supplement 2 - Source Data 1 - Annotated.pdf]

Figure 1 - Figure Supplement 3 - Source Data 1

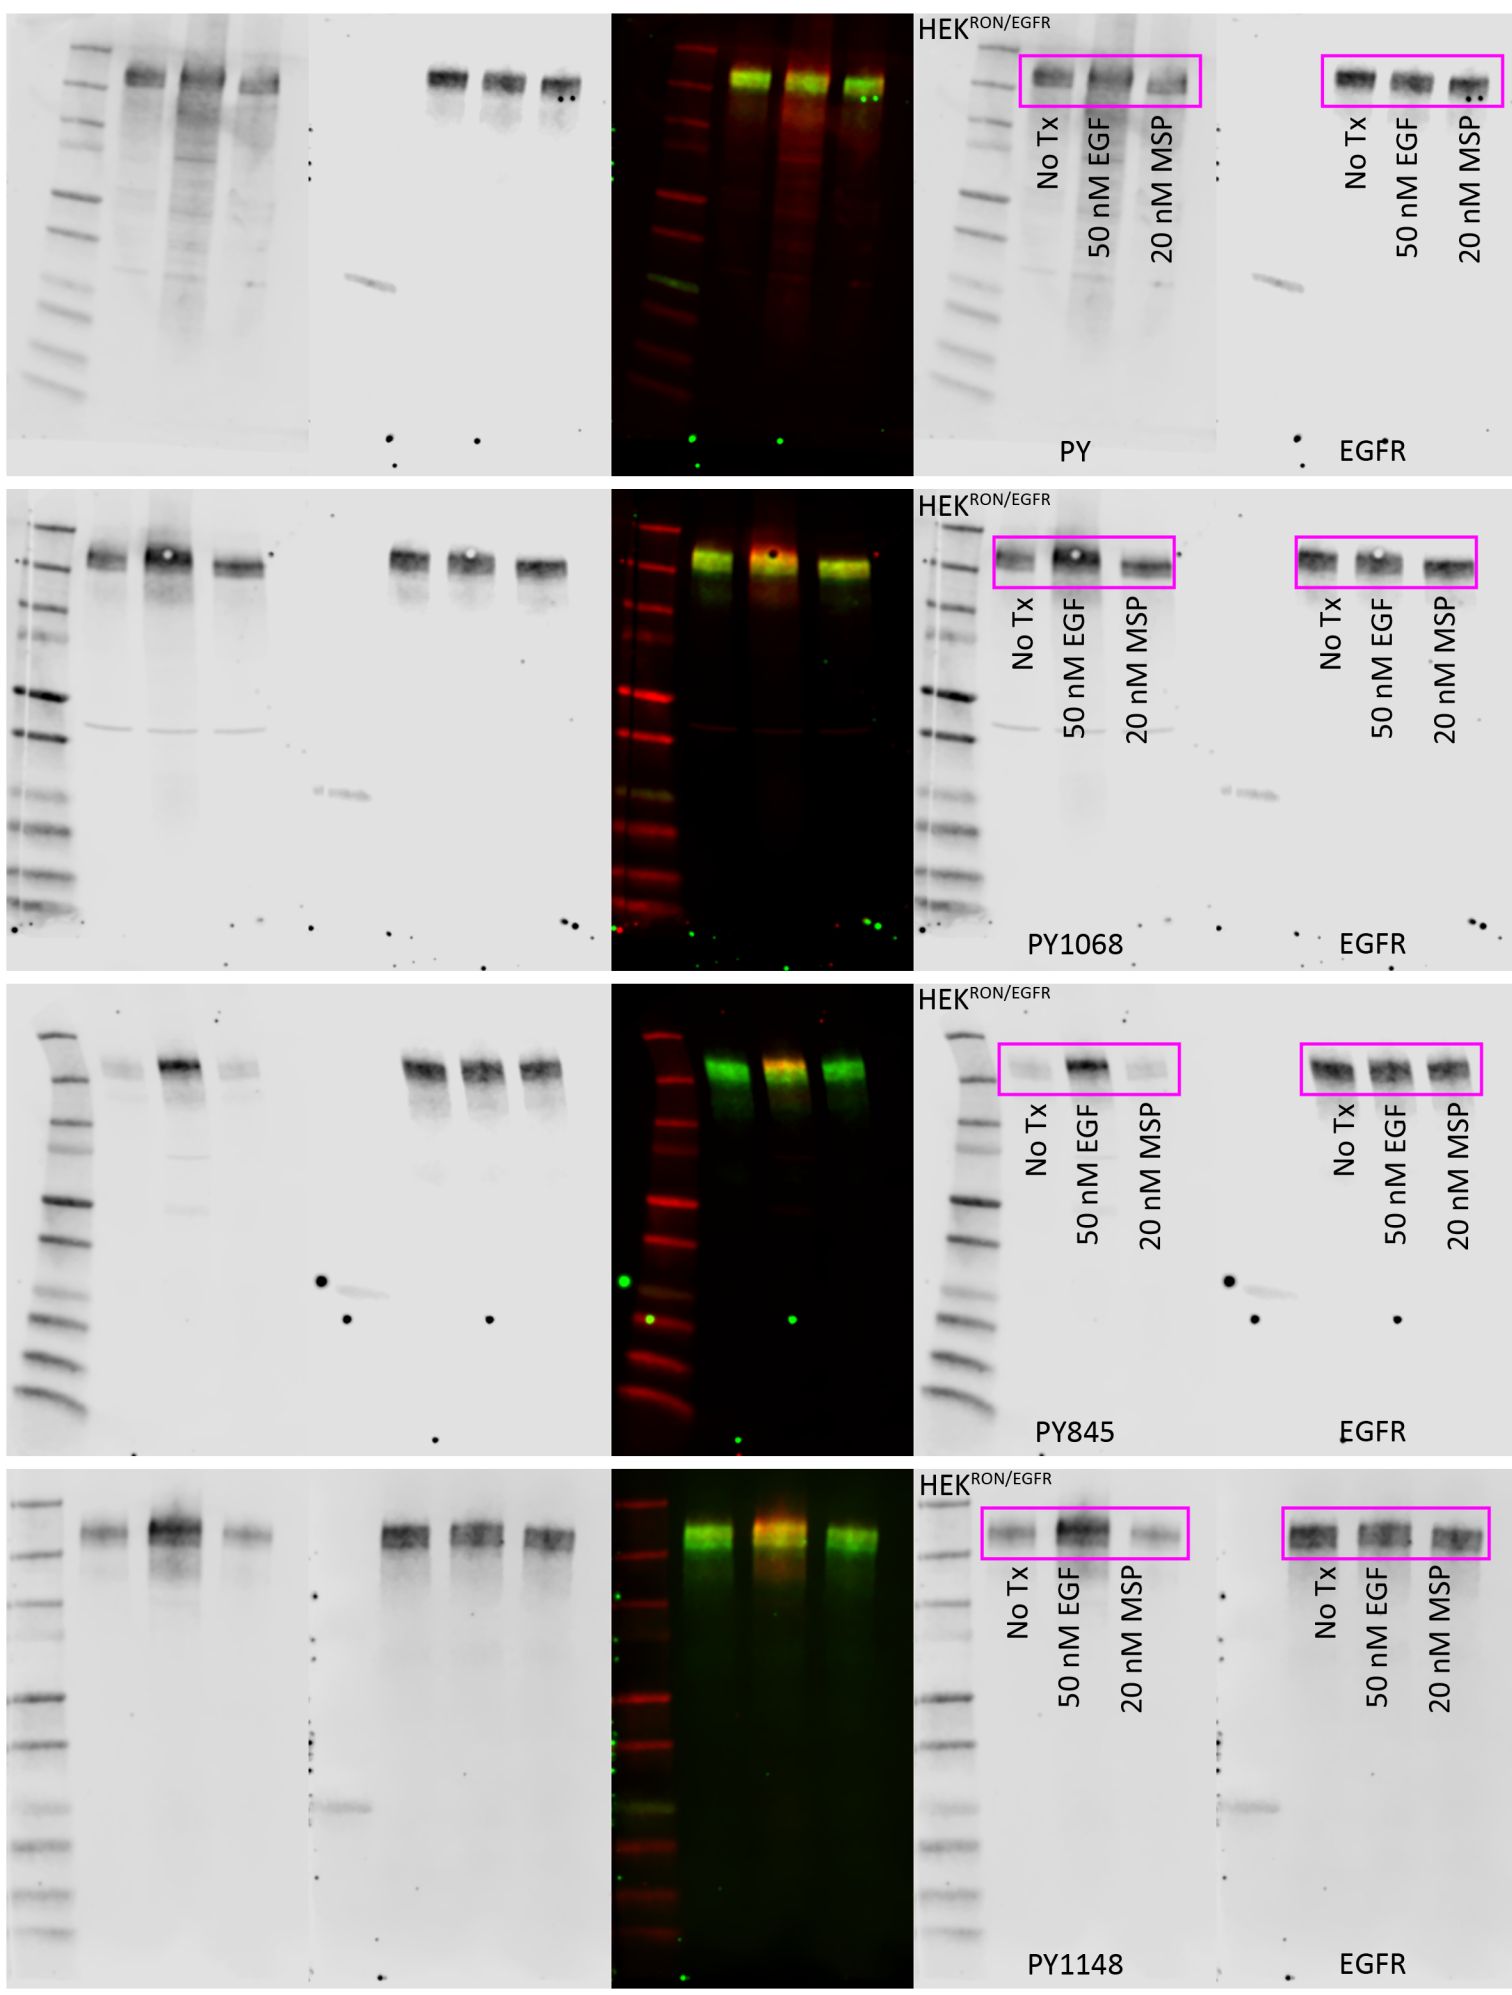

Supplement: fig1-figsupp3-data1 [file elife-63678-fig1-figsupp3-data1-v2.zip]

Figure 1 - Figure Supplement 4 - Source Data 1

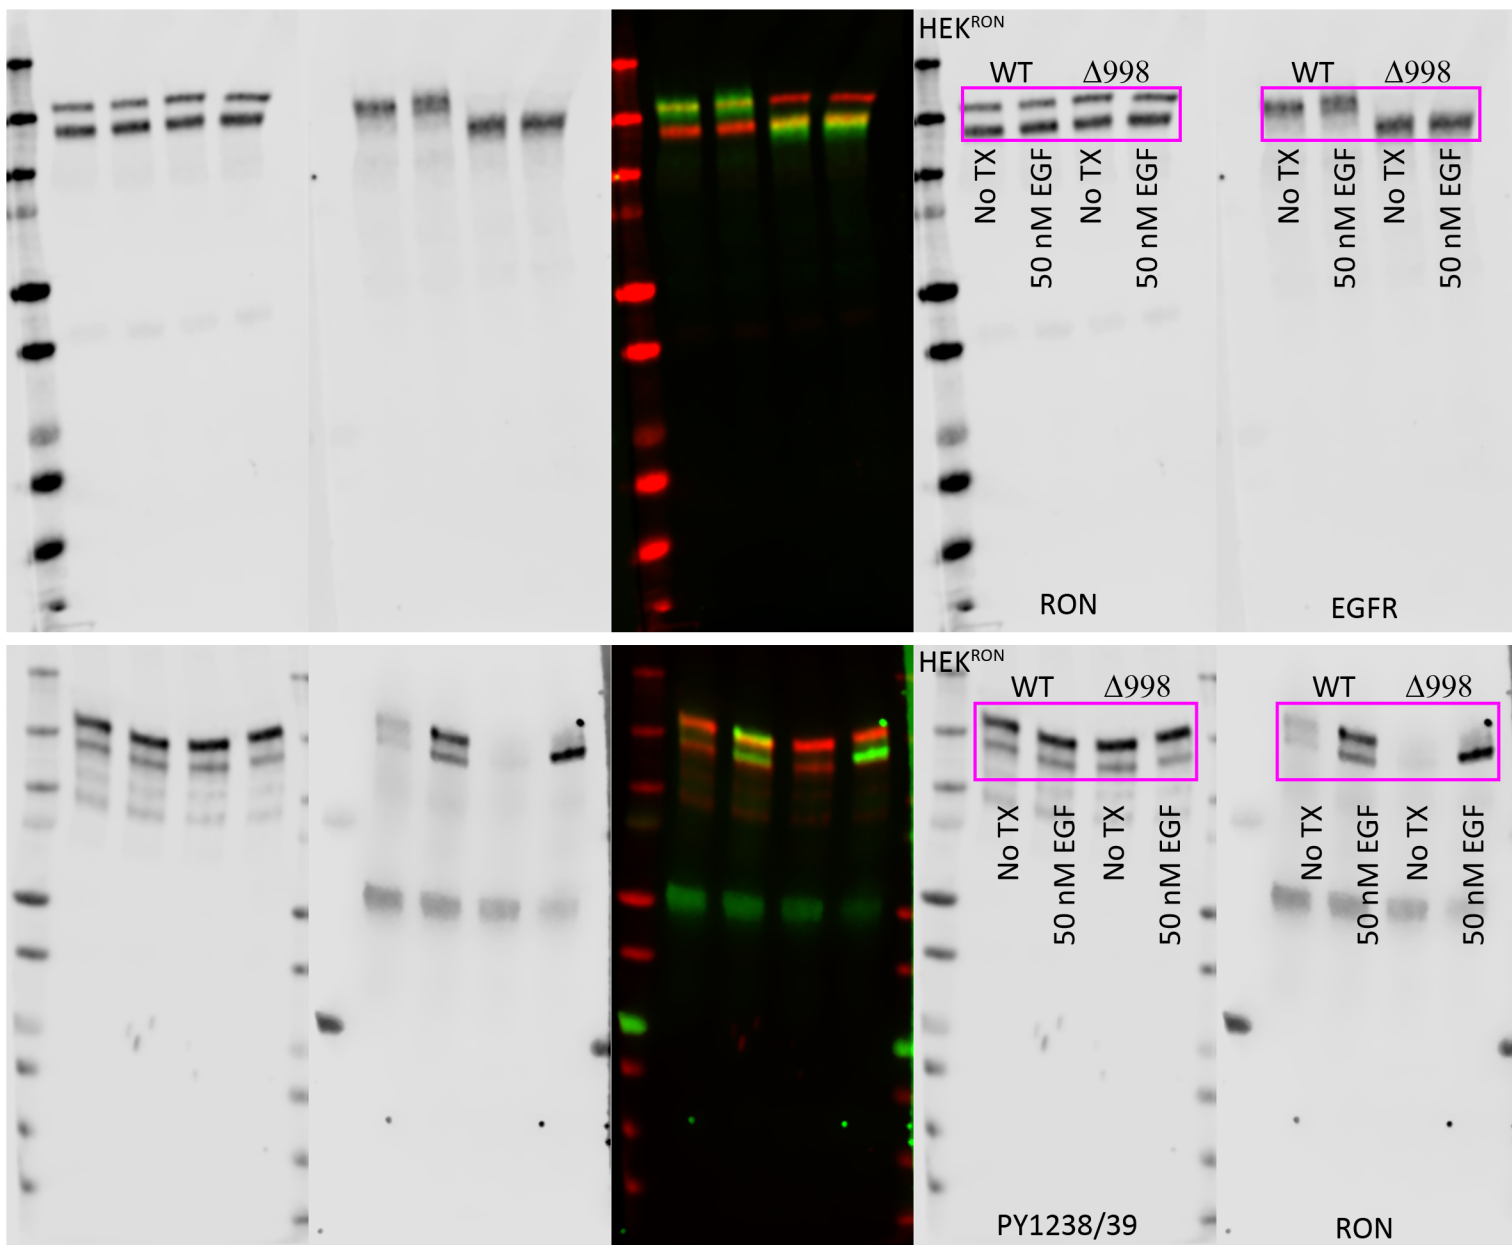

Supplement: fig1-figsupp4-data1 [file Figure 1 - Figure Supplement 4 - Source Data 1 - Annotated.pdf › Figure 1 - Figure Supplement 4 - Source Data 1/Figure 1 - Figure Supplement 4 - Source Data 1 - Annotated.pdf]

Figure 5A - Source Data

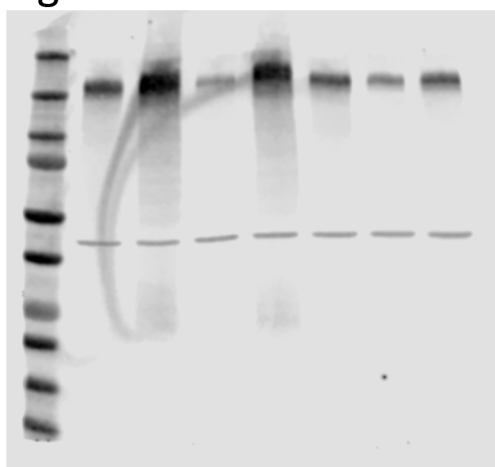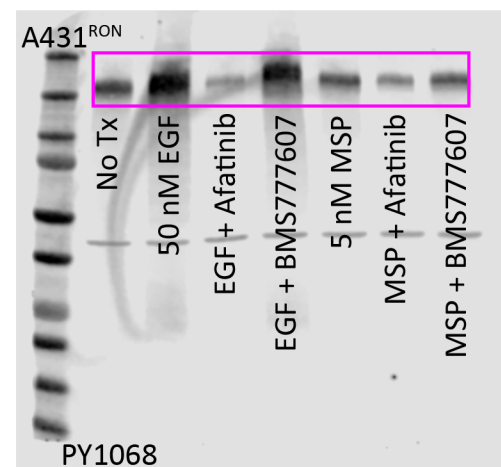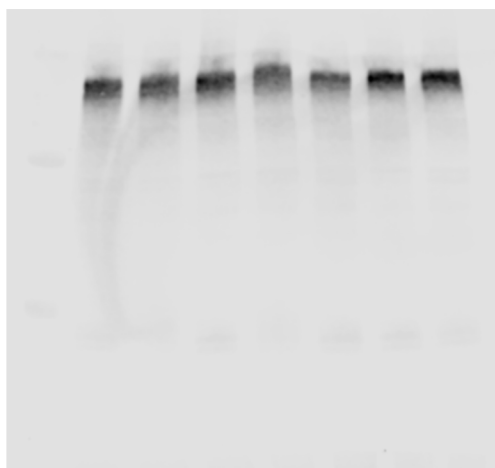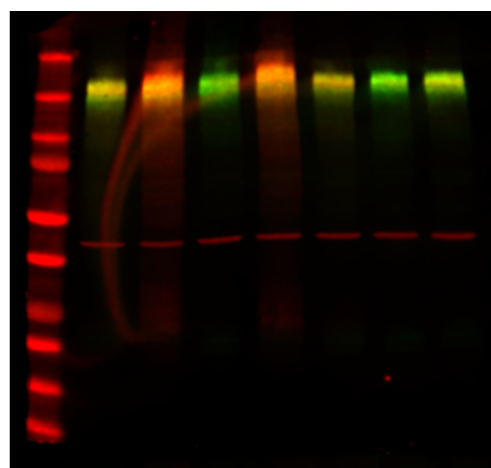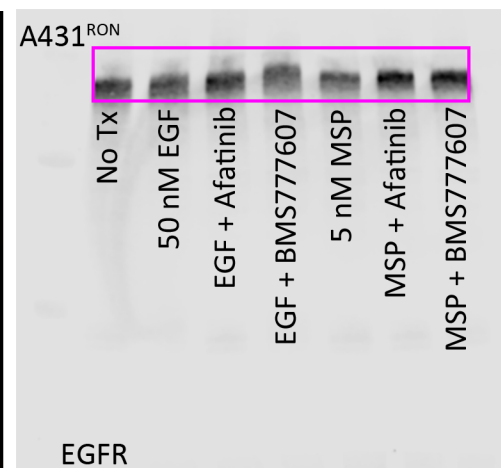

Figure 5B - Source Data

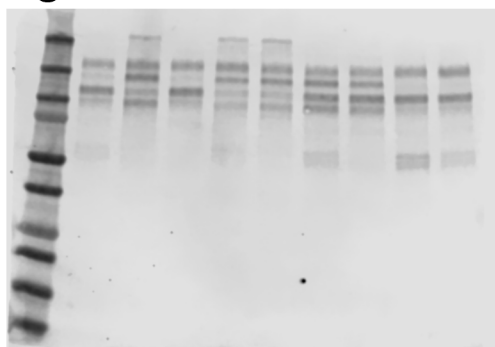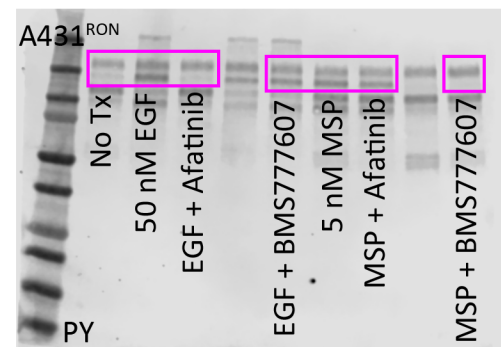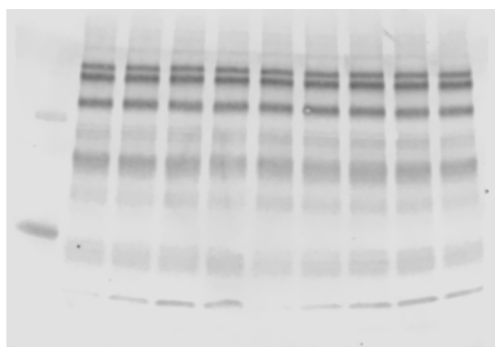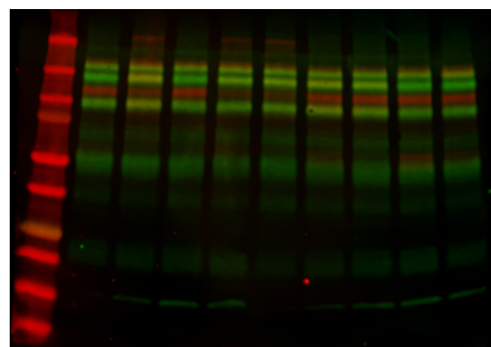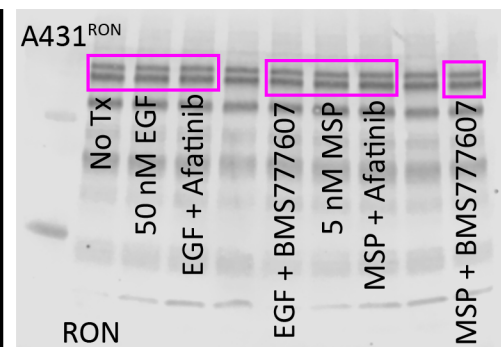

Supplement: fig5-data1 [file Figure 5 - Source Data 1 - Annotated.pdf › Figure 5 - Source Data 1/Figure 5 - Source Data 1 - Annotated.pdf]

Figure 5 - Figure Supplement 1 - Source Data 1

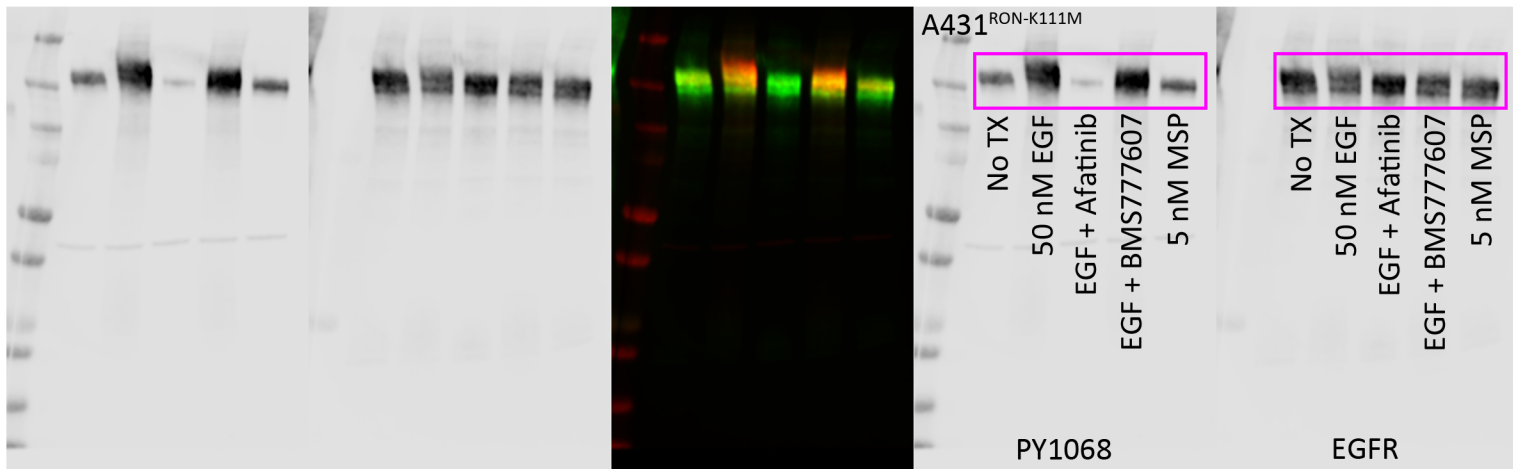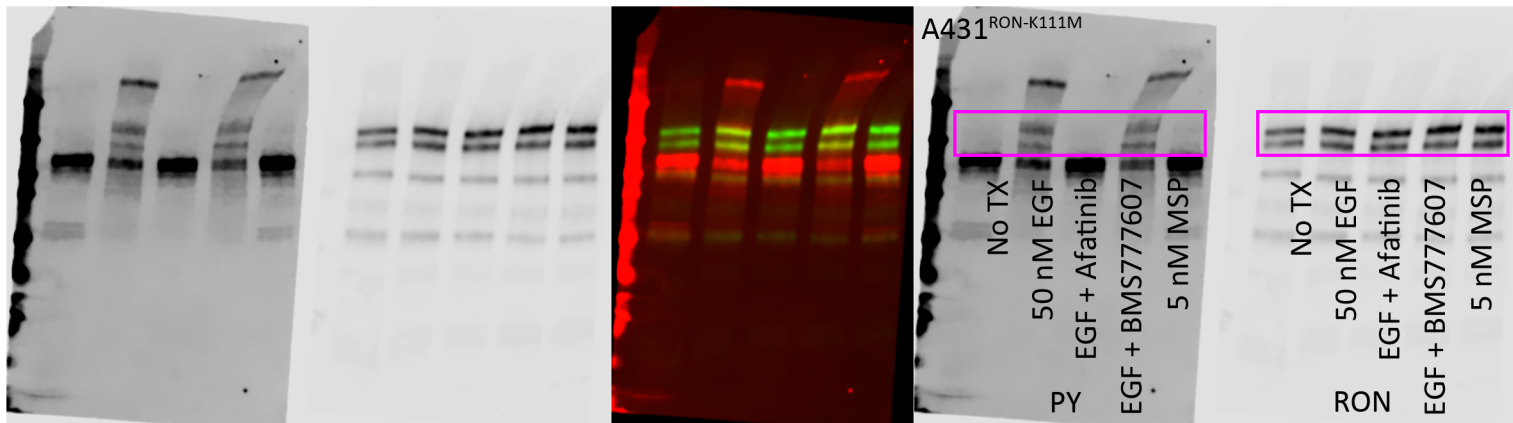

Supplement: fig5-figsupp1-data1 [file elife-63678-fig5-figsupp1-data1-v2.zip]

Figure 6A - Source Data

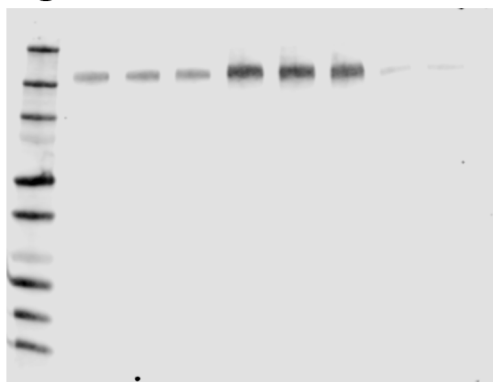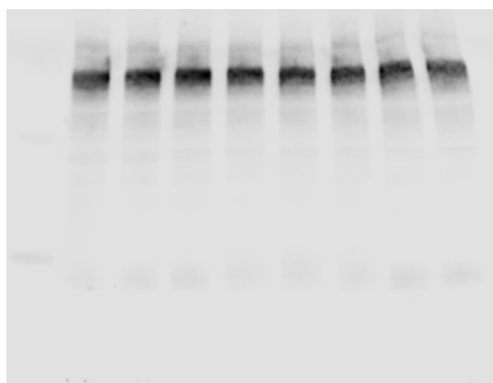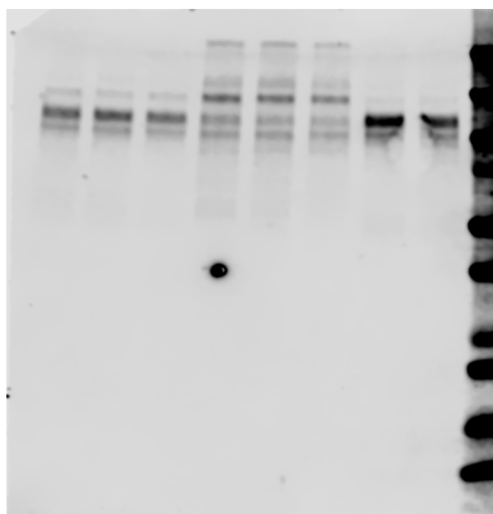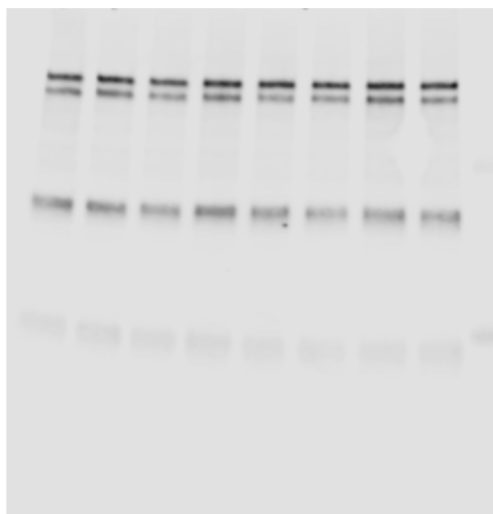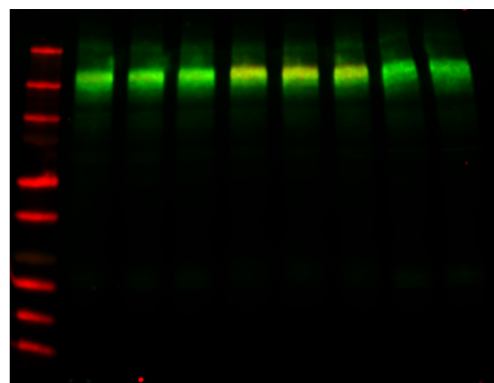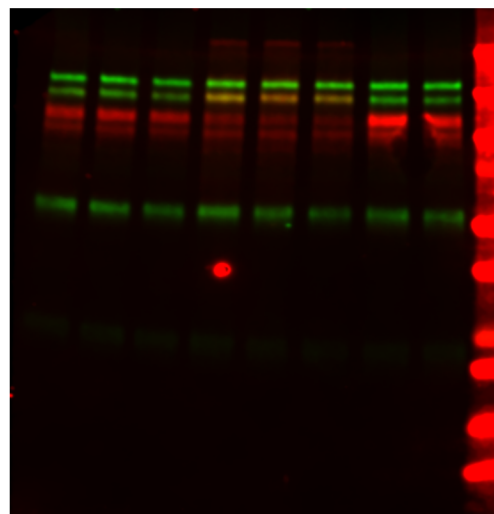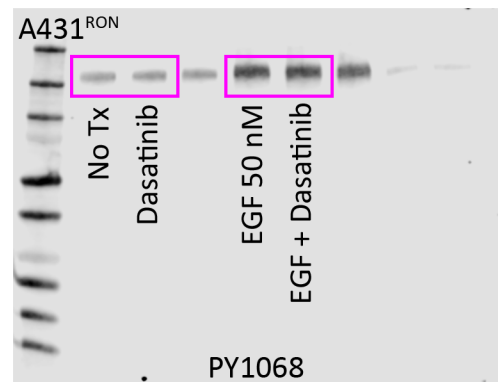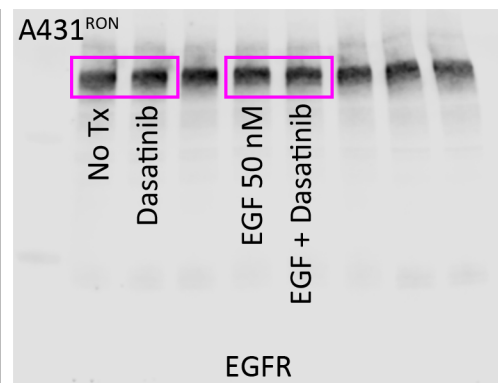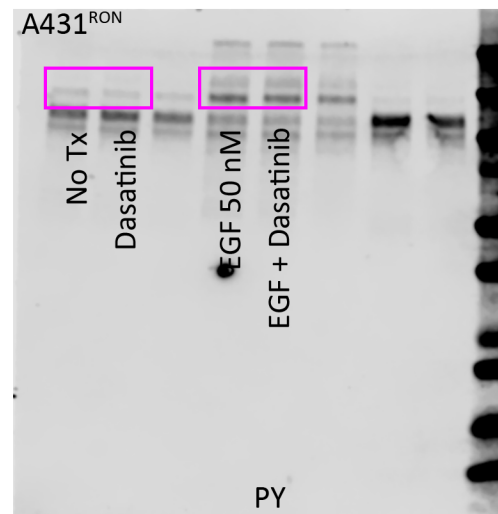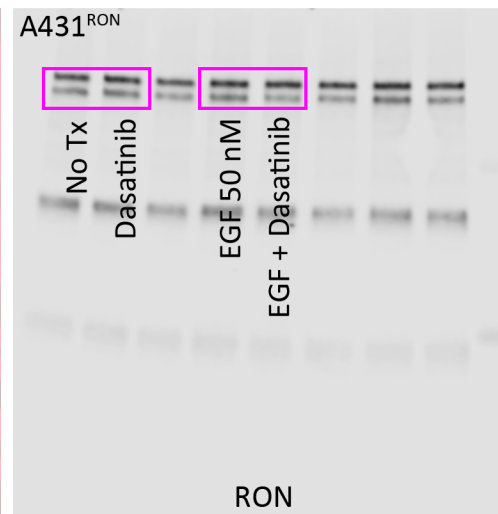

Figure 6B - Source Data

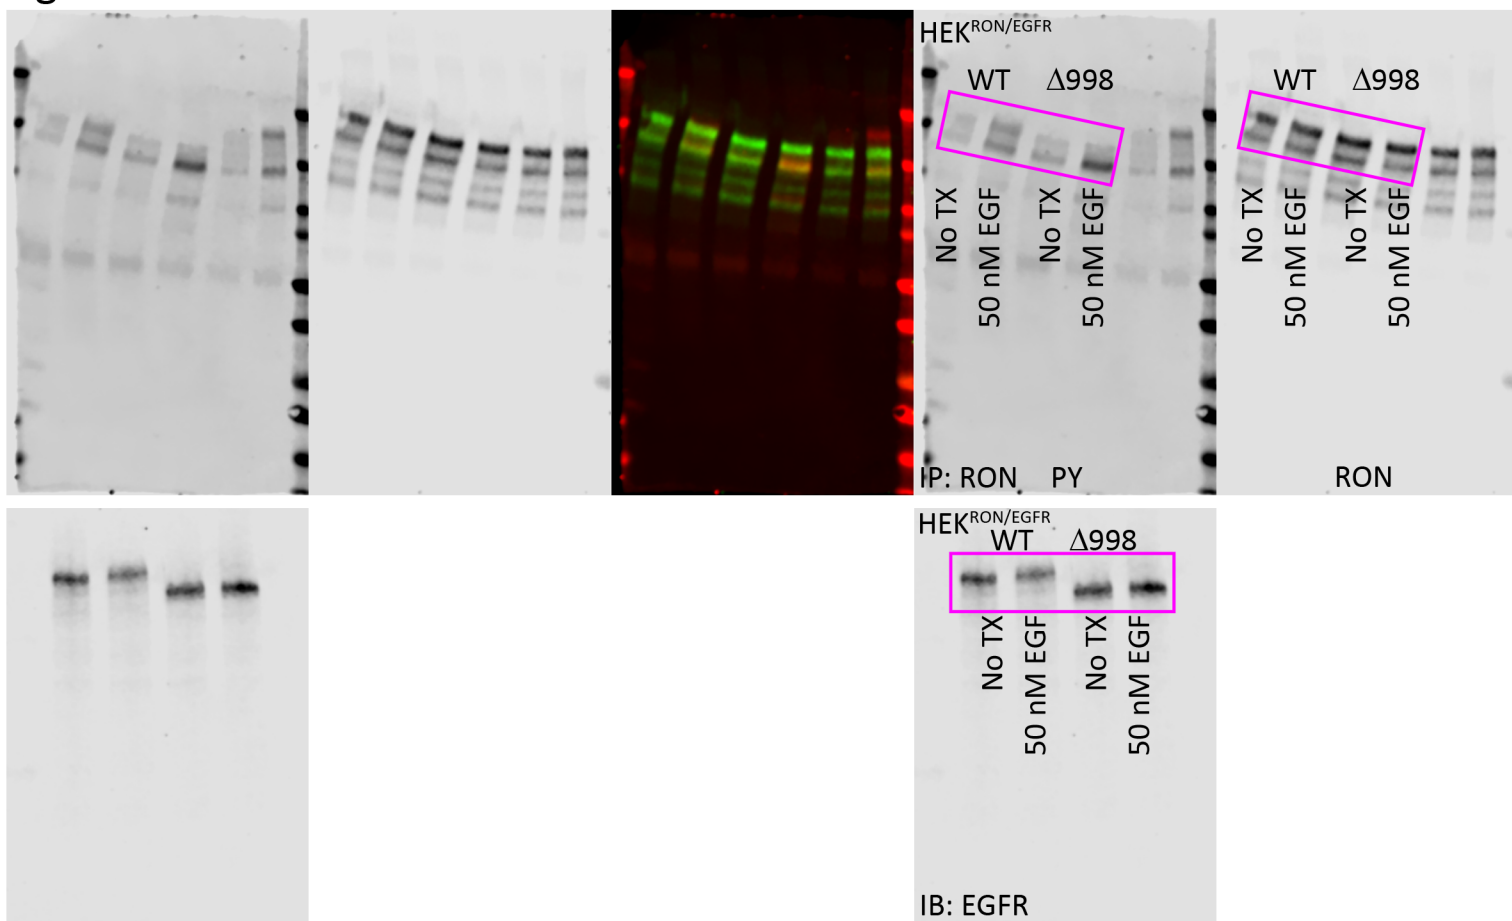

Figure 6C - Source Data

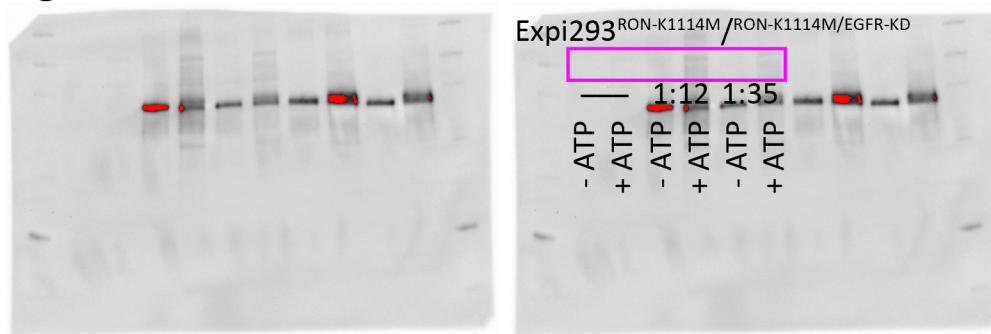

Supplement: fig6-data1 [file Figure 6 - Source Data 1 - Annotated.pdf › Figure 6 - Source Data 1/Figure 6 - Source Data 1 - Annotated.pdf]

Figure 6 - Figure Supplement 1 - Source Data 1

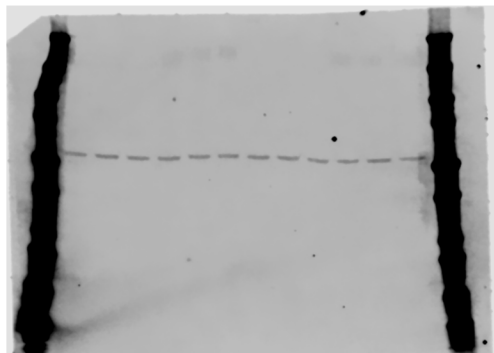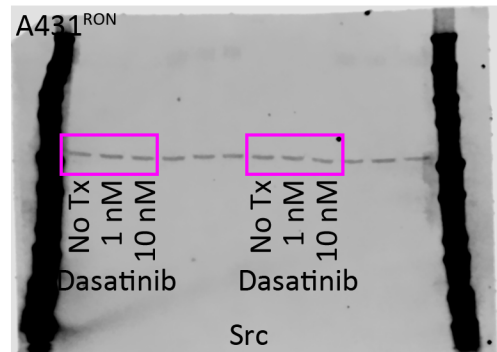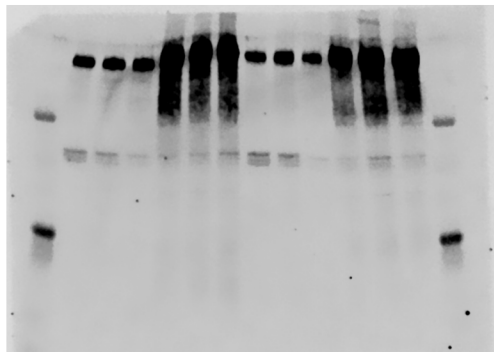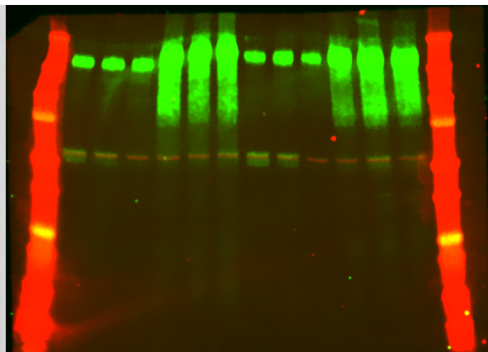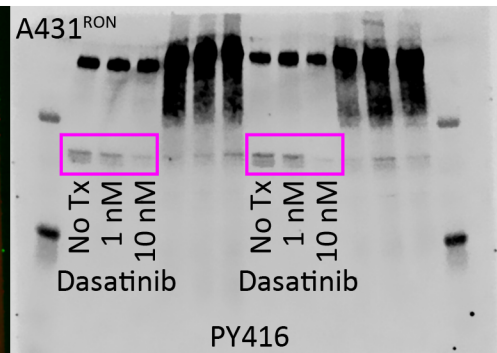

Supplement: fig6-figsupp1-data1 [file Figure 6 - Figure Supplement 1 - Source Data 1 - Annotated.pdf › Figure 6 - Figure Supplement 1 - Source Data 1/Figure 6 - Figure Supplement 1 - Source Data 1 - Annotated.pdf]

Figure 7 - Source Data 1

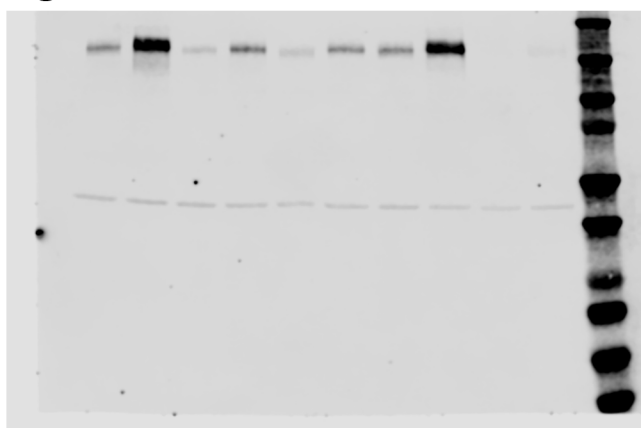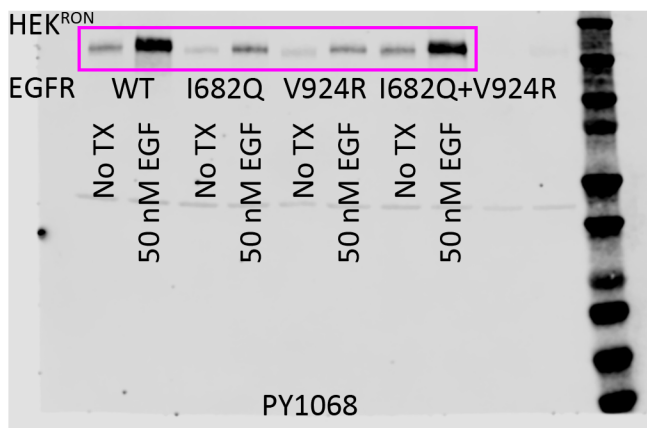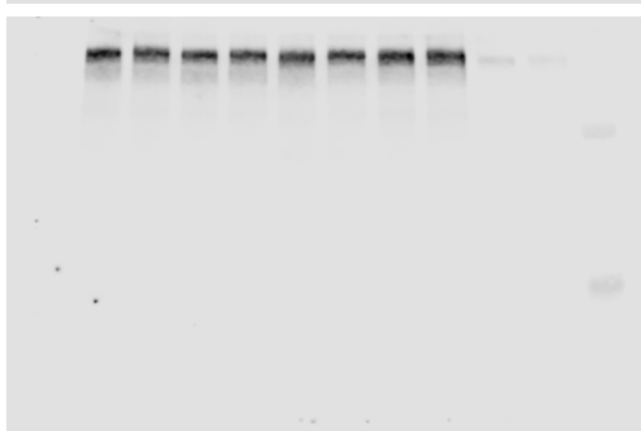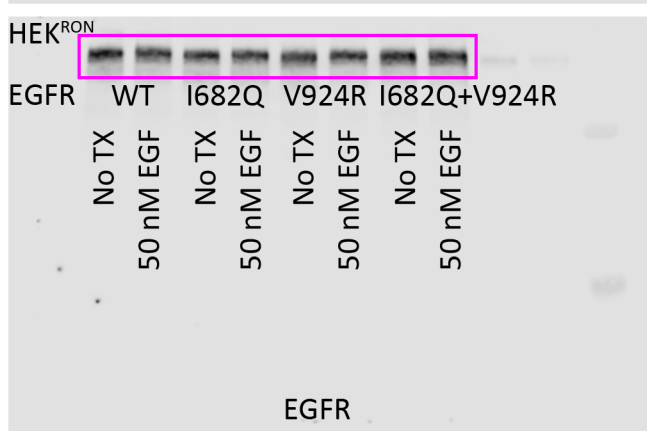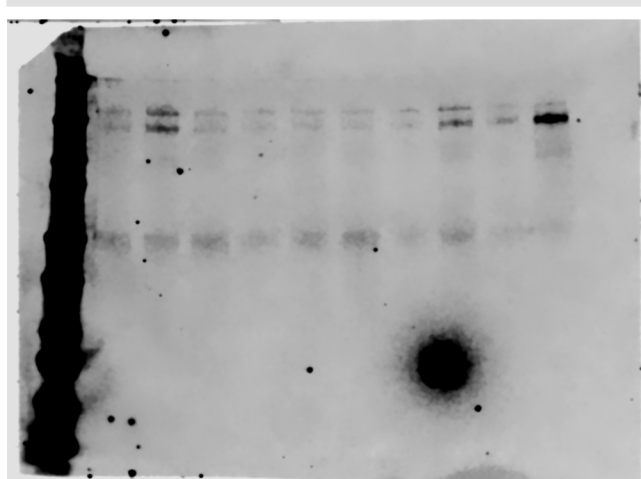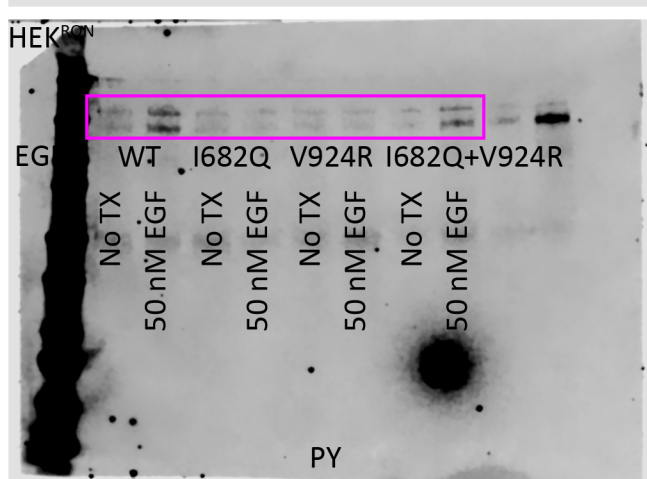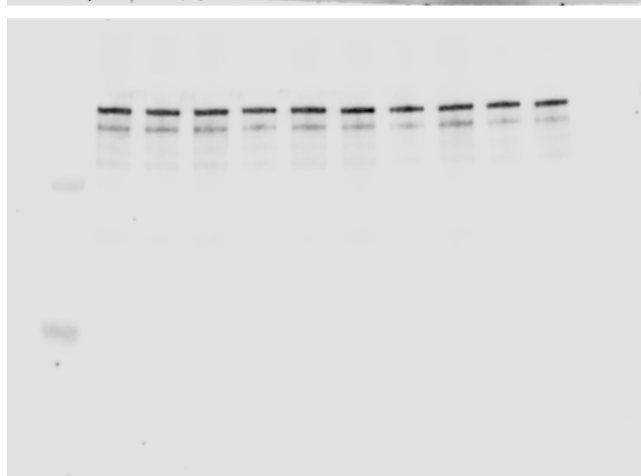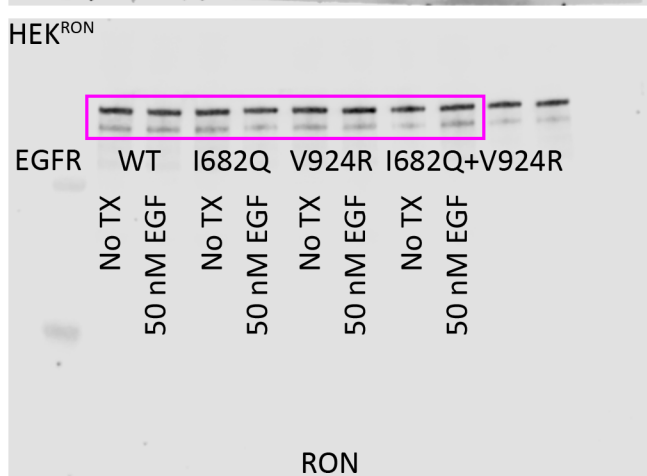

Supplement: fig7-data1 [file Figure 7 - Source Data 1 - Annotated.pdf › Figure 7 - Source Data 1/Figure 7 - Source Data 1 - Annotated.pdf]
